# Supplementary material
Source: HighWire-hosted journal article supplement (https://erj.ersjournals.com/content/60/5/2200425)
Supplement: inline-supplementary-material-2 [file inline-supplementary-material-2.pdf]

## Appendix 2: Search strategy

### Background:

Final searches were performed on June 21<sup>st</sup> 2021, without date restrictions.

### Medline (Ovid MEDLINE(R) ALL):

|    | Search terms                                                                                                                                                       | Results |
|----|--------------------------------------------------------------------------------------------------------------------------------------------------------------------|---------|
| 1  | exp Lung Diseases, Interstitial/ or exp Pulmonary Fibrosis/                                                                                                        | 77550   |
| 2  | ((interstitial adj3 (disease* or abnormalit* or pneumonia)) or ((pulmonary or lung) adj3 fibrosis) or ILD or IPF or UIP or (Diffuse adj2 lung-disease*)).ti,ab,kf. | 46080   |
| 3  | 1 or 2                                                                                                                                                             | 99446   |
| 4  | (VATS or (Video adj3 thoroscop*)).ti,ab,kf.                                                                                                                        | 9501    |
| 5  | cryo*.ti,ab,kf.                                                                                                                                                    | 97382   |
| 6  | ((surgic* or open or forceps or transbranch* or thoracoscop*) adj3 biop*).ti,ab,kf.                                                                                | 16327   |
| 7  | 4 or 5 or 6                                                                                                                                                        | 122723  |
| 18 | 3 and 7                                                                                                                                                            | 2540    |

### Embase (embase.com):

|    | Search terms                                                                                                                                                                                                               | Results |
|----|----------------------------------------------------------------------------------------------------------------------------------------------------------------------------------------------------------------------------|---------|
| 1  | 'interstitial lung disease'/exp OR 'interstitial lung disease' OR 'lung fibrosis'/exp OR 'lung fibrosis'                                                                                                                   | 138170  |
| 2  | ((interstitial NEAR/3 (disease* OR abnormalit* OR pneumonia)):ti,ab,kw) OR (((pulmonary OR lung) NEAR/3 fibrosis):ti,ab,kw) OR ild:ti,ab,kw OR ipf:ti,ab,kw OR uip:ti,ab,kw OR ((diffuse NEAR/2 'lung disease*'):ti,ab,kw) | 75817   |
| 3  | #1 OR #2                                                                                                                                                                                                                   | 154243  |
| 4  | vats:ti,ab,kw OR ((video NEAR/3 thoroscop*):ti,ab,kw)                                                                                                                                                                      | 14171   |
| 5  | cryo*:ti,ab,kw                                                                                                                                                                                                             | 130953  |
| 6  | ((surgic* OR open OR forceps OR transbranch* OR thoracoscop*) NEAR/3 biop*):ti,ab,kw                                                                                                                                       | 33484   |
| 7  | #4 OR #5 OR #6                                                                                                                                                                                                             | 176821  |
| 8  | #3 AND #7                                                                                                                                                                                                                  | 6283    |
| 9  | #8 NOT 'conference abstract'/it                                                                                                                                                                                            | 4004    |
| 10 | #9 AND [embase]/lim                                                                                                                                                                                                        | 3341    |

### Total number of records identified:

Total number of search results in Medline and Embase: 5881

Total number of search results after removal of duplicates: 4325
