# Supplementary material
Source: HighWire-hosted journal article supplement (https://erj.ersjournals.com/content/60/5/2200425)
Supplement: inline-supplementary-material-4 [file inline-supplementary-material-4.pdf]

#### **Appendix 4: Rating of outcomes**

##### **Background:**

Twelve task force members participated in the survey. For each PICO, they were asked to rate its importance (from a patient-perspective) a scale from 1 to 9, where 1 corresponds to 'extremely irrelevant' and 9 to 'extremely relevant'. The outcomes per PICO were as follows:

##### **PICO question 1:**

*In patients with undiagnosed ILD considered eligible to undergo SLB, is TBLC a valid replacement test?*

|                       | Average | Final     |
|-----------------------|---------|-----------|
| Diagnostic yield      | 7.8     | Critical  |
| Diagnostic accuracy   | 7.8     | Critical  |
| Diagnostic confidence | 7.3     | Critical  |
| Complication rate     | 7.7     | Critical  |
| Costs                 | 5.6     | Important |
| Quality of life       | 6.7     | Important |
| Lung function         | 6.2     | Important |
| Mortality             | 8.7     | Critical  |
| Exercise tolerance    | 5.8     | Important |
| Survival              | 7.0     | Critical  |

##### **PICO question 2:**

*In patients with undiagnosed ILD not considered eligible to undergo SLB, does TBLC increase the diagnostic confidence of the multidisciplinary team discussion?*

|                       | Average | Final     |
|-----------------------|---------|-----------|
| Diagnostic yield      | 7.3     | Critical  |
| Diagnostic accuracy   | 7.4     | Critical  |
| Diagnostic confidence | 7.3     | Critical  |
| Complication rate     | 6.7     | Important |
| Costs                 | 5.5     | Important |
| Quality of life       | 5.7     | Important |
| Lung function         | 5.5     | Important |
| Mortality             | 7.6     | Critical  |
| Exercise tolerance    | 5.7     | Important |
| Survival              | 7.0     | Critical  |

**PICO question 3:**

*In patients with undiagnosed ILD and a non-informative TBLC, is step-up SLB or second TBLC a valid add-on test?*

|                       | Average | Final     |
|-----------------------|---------|-----------|
| Diagnostic yield      | 7.8     | Critical  |
| Diagnostic accuracy   | 7.9     | Critical  |
| Diagnostic confidence | 8.0     | Critical  |
| Complication rate     | 7.2     | Critical  |
| Costs                 | 5.8     | Important |
| Quality of life       | 6.6     | Important |
| Lung function         | 5.7     | Important |
| Mortality             | 8.4     | Critical  |
| Exercise tolerance    | 6.0     | Important |
| Survival              | 8.1     | Critical  |

**PICO question 4:**

*Is formal training in TBLC recommended to optimize diagnostic yield and minimize adverse events in patients with undiagnosed ILD?*

|                       | Average | Final     |
|-----------------------|---------|-----------|
| Diagnostic yield      | 7.0     | Critical  |
| Diagnostic accuracy   | 6.7     | Important |
| Diagnostic confidence | 6.4     | Important |
| Complication rate     | 7.9     | Critical  |
| Costs                 | 5.2     | Important |
| Quality of life       | 5.3     | Important |
| Lung function         | 4.8     | Important |
| Mortality             | 8.1     | Critical  |
| Exercise tolerance    | 5.0     | Important |
| Survival              | 6.8     | Critical  |
