# Supplementary material
Source: HighWire-hosted journal article supplement (https://erj.ersjournals.com/content/60/5/2200425)
Supplement: inline-supplementary-material-5 [file inline-supplementary-material-5.pdf]

## Appendix 5: Included studies per guideline question

### Overall flowchart:

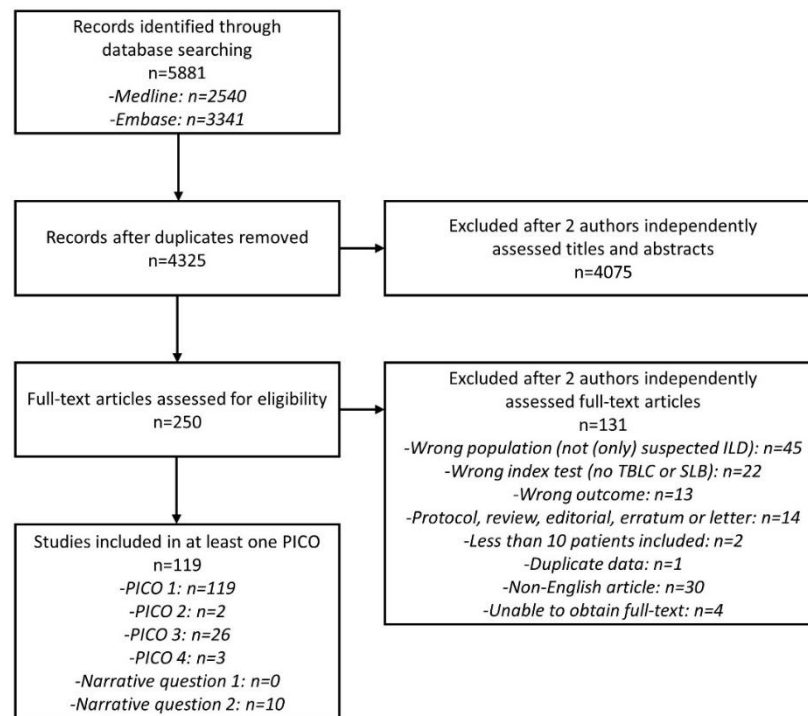

### Flowchart PICO question 1:

*In patients with undiagnosed ILD considered eligible to undergo SLB, is TBLC a valid replacement test?*

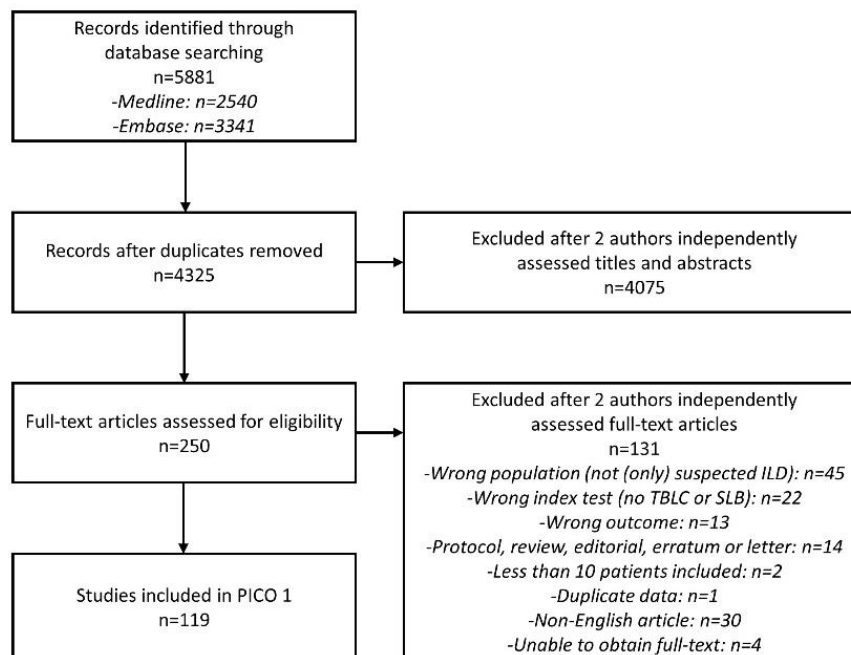

### Final included PICO question 1 (n=119):

1. Abdelghani R, Thakore S, Kaphle U, Lasky JA, Kheir F. Radial Endobronchial Ultrasound-guided Transbronchial Cryobiopsy. *J Bronchology Interv Pulmonol* 2019; 26(4): 245-249.
2. Aburto M, Pérez- Izquierdo J, Agirre U, Barredo I, Echevarria-Uraga JJ, Armendariz K, García S, Bronte O, Gorordo I, Egurrola M, Aramburu A, España PP, Esteban C. Complications and hospital admission in the following 90 days after lung cryobiopsy performed in interstitial lung disease, M. Aburto, Servicio de Neumología, Hospital Universitario de Galdakao-Usansolo, Barrio Labeaga 46A, Galdakao, Bizkaia, Spain, 2020.
3. Ahmed S, El Hindawi A, Mashhour S. Spectrum of diffuse parenchymal lung diseases using medical thoracoscopic lung biopsy: An experience with 55 patients during 2013–2015. *Egyptian Journal of Chest Diseases and Tuberculosis* 2016; 65(3): 717-722.
4. Akl Y, Elhendway A, Elnady MA, Moussa H, Abdelsalam E, Abuelhassan UE. Medical thoracoscopic lung biopsy in undiagnosed non-UIP-DPLD: Diagnostic yield, complication rate, and cost-effectiveness, a single-experience study in Egypt. *Egyptian Journal of Chest Diseases and Tuberculosis* 2020; 69(1): 178-182.
5. Almeida LM, Lima B, Mota PC, Melo N, Magalhaes A, Pereira JM, Moura CS, Guimaraes S, Morais A. Learning curve for transbronchial lung cryobiopsy in diffuse lung disease. *Rev Port Pneumol* 2017; 22: 22.
6. Ambrogi V, Mineo TC. VATS biopsy for undetermined interstitial lung disease under non-general anesthesia: comparison between uniportal approach under intercostal block vs. three-ports in epidural anesthesia. *Journal of Thoracic Disease* 2014; 6(7): 888-895.
7. Ayed AK, Raghunathan R. Thoracoscopy versus open lung biopsy in the diagnosis of interstitial lung disease: a randomised controlled trial. *J R Coll Surg Edinb* 2000; 45(3): 159-163.

8. Babiak A, Hetzel J, Krishna G, Fritz P, Moeller P, Balli T, Hetzel M. Transbronchial cryobiopsy: A new tool for lung biopsies. *Respiration* 2009; 78(2): 203-208.
9. Bando M, Ohno S, Hosono T, Yanase K, Sato Y, Sohara Y, Hironaka M, Sugiyama Y. Risk of Acute Exacerbation After Video-assisted Thoracoscopic Lung Biopsy for Interstitial Lung Disease. *J Bronchology Interv Pulmonol* 2009; 16(4): 229-235.
10. Bango-Alvarez A, Ariza-Prota M, Torres-Rivas H, Fernandez-Fernandez L, Prieto A, Sanchez I, Gil M, Pando-Sandoval A. Transbronchial cryobiopsy in interstitial lung disease: experience in 106 cases - how to do it. *ERJ open res* 2017; 3(1).
11. Biancosino C, Welker L, Kruger M, Bolukbas S, Bittmann I, Kirsten D. Diagnostic Gain from Surgical Biopsy for Interstitial Lung Disease - When is it Worth the Risk? *Pneumologie* 2016; 70(3): 205-210.
12. Blackhall V, Asif M, Renieri A, Civitelli S, Kirk A, Jilaihawi A, Granato F. The role of surgical lung biopsy in the management of interstitial lung disease: experience from a single institution in the UK. *Interact Cardiovasc Thorac Surg* 2013; 17(2): 253-257.
13. Blanco M, Obeso GA, Duran JC, Rivo JE, Garcia-Fontan E, Pena E, Rodriguez M, Albort J, Canizares MA. Surgical lung biopsy for diffuse lung disease. Our experience in the last 15 years. *Rev Port Pneumol* 2013; 19(2): 59-64.
14. Blewett CJ, Bennett WF, Miller JD, Urschel JD. Open lung biopsy as an outpatient procedure. *Annals of Thoracic Surgery* 2001; 71(4): 1113-1115.
15. Bondue B, Leduc D, Froidure A, Pieters T, Taton O, Heinen V, Alexander P, Hoton D, Dome F, Rimmelinck M. Usefulness of surgical lung biopsies after cryobiopsies when pathological results are inconclusive or show a pattern suggestive of a nonspecific interstitial pneumonia. *Respiratory Research* 2020; 21(1): 231.
16. Bondue B, Pieters T, Alexander P, De Vuyst P, Ruiz Patino M, Hoton D, Rimmelinck M, Leduc D. Role of Transbronchial Lung Cryobiopsies in Diffuse Parenchymal Lung Diseases: Interest of a Sequential Approach. *Pulm Med* 2017; 2017: 6794343.
17. Bondue B, Schlossmacher P, Allou N, Gazaille V, Taton O, Gevenois PA, Vanderghyest F, Rimmelinck M, Leduc D. Trans-bronchial lung cryobiopsy in patients at high-risk of complications. *BMC pulm* 2021; 21(1): 135.
18. Carrillo Rodríguez JG, Estrada A, Pedroza J, Aragón B, Mejía M, Navarro C, Selman M. Preoperative risk factors associated with mortality in lung biopsy patients with interstitial lung disease. *Journal of Investigative Surgery* 2005; 18(1): 39-45.
19. Cascante JA, Cebollero P, Herrero S, Yague A, Echegoyen A, Elizalde J, Hueto J. Transbronchial Cryobiopsy in Interstitial Lung Disease: Are We on the Right Path? *J Bronchology Interv Pulmonol* 2016; 23(3): 204-209.
20. Casoni GL, Tomassetti S, Cavazza A, Colby TV, Dubini A, Ryu JH, Carretta E, Tantalocco P, Piciocchi S, Ravaglia C, Gurioli C, Romagnoli M, Gurioli C, Chilosi M, Poletti V. Transbronchial lung cryobiopsy in the diagnosis of fibrotic interstitial lung diseases. *PLoS ONE* 2014; 9(2): e86716.

21. Cherchi R, Grimaldi G, Pinna-Susnik M, Riva L, Sarais S, Santoru M, Perra R, Allieri R, Porcu GS, Nemolato S, Mameli A, Loi F, Ferrari PA. Retrospective outcomes analysis of 99 consecutive uniportal awake lung biopsies: a real standard of care? *Journal of Thoracic Disease* 2020; 12(9): 4717-4730.
22. Cho R, Zamora F, Gibson H, Dincer HE. Transbronchial Lung Cryobiopsy in the Diagnosis of Interstitial Lung Disease: A Retrospective Single-center Experience. *J Bronchology Interv Pulmonol* 2019; 26(1): 15-21.
23. Cirak AK, Katgi N, Erer OF, Cimen P, Tuksavul FF, Hakoglu B. Diagnostic approach in parenchymal lung diseases: transbronchial lung biopsy or cryobiopsy? *Turkish Journal of Medical Sciences* 2020; 50(6): 1535-1539.
24. Cooley J, Balestra R, Aragaki-Nakahodo AA, Caudell Stamper DN, Sriprasart T, Swank Z, Baughman RP, Benzaquen S. Safety of performing transbronchial lung cryobiopsy on hospitalized patients with interstitial lung disease. *Respir Med* 2018; 140: 71-76.
25. Davidsen JR, Skov IR, Louw IG, Laursen CB. Implementation of transbronchial lung cryobiopsy in a tertiary referral center for interstitial lung diseases: a cohort study on diagnostic yield, complications, and learning curves. *BMC pulm* 2021; 21(1): 67.
26. Dhooria S, Agarwal R, Sehgal IS, Aggarwal AN, Goyal R, Guleria R, Singhal P, Shah SP, Gupta KB, Koolwal S, Akkaraju J, Annapoorni S, Bal A, Bansal A, Behera D, Chhajed PN, Dhamija A, Dhar R, Garg M, Gopal B, Hibare KR, James P, Jindal A, Jindal SK, Khan A, Kishore N, Koul PA, Kumar A, Kumar R, Lall A, Madan K, Mandal A, Mehta RM, Mohan A, Nangia V, Nath A, Nayar S, Patel D, Pattabhiraman V, Raghupati N, Sarkar PK, Singh V, Sivaramakrishnan M, Srinivasan A, Swarnakar R, Talwar D, Thangakunam B. Bronchoscopic lung cryobiopsy: An Indian association for bronchology position statement. *Lung India* 2019; 36(1): 48-59.
27. Dhooria S, Mehta RM, Srinivasan A, Madan K, Sehgal IS, Pattabhiraman V, Yadav P, Sivaramakrishnan M, Mohan A, Bal A, Garg M, Agarwal R. The safety and efficacy of different methods for obtaining transbronchial lung cryobiopsy in diffuse lung diseases. *Clin Respir J* 2018; 12(4): 1711-1720.
28. Dhooria S, Sehgal IS, Aggarwal AN, Behera D, Agarwal R. Diagnostic Yield and Safety of Cryoprobe Transbronchial Lung Biopsy in Diffuse Parenchymal Lung Diseases: Systematic Review and Meta-Analysis. *Respir Care* 2016; 61(5): 700-712.
29. Durheim MT, Kim S, Gulack BC, Burfeind WR, Gaissert HA, Kosinski AS, Hartwig MG. Mortality and Respiratory Failure After Thoracoscopic Lung Biopsy for Interstitial Lung Disease. *Annals of Thoracic Surgery* 2017; 104(2): 465-470.
30. Echevarria-Uraga JJ, Perez-Izquierdo J, Garcia-Garai N, Gomez-Jimenez E, Aramburu-Ojembarrena A, Tena-Tudanca L, Miguelez-Vidales JL, Capelastegui-Saiz A. Usefulness of an angioplasty balloon as selective bronchial blockade device after transbronchial cryobiopsy. *Respirology* 2016; 21(6): 1094-1099.
31. Elhadidy T, Ibrahim M, Moustafa FEH, fathy A, Abd El- Maksoud A. Video-assisted medical thoracoscopic (VAMT) lung biopsy in the diagnosis of diffuse pulmonary infiltrates. *Egyptian Journal of Chest Diseases and Tuberculosis* 2017; 66(1): 153-156.
32. Esme H, Sezer M, Solak O, Şahin Ö. Importance of open lung biopsy in patients suspected interstitial lung disease. *European Journal of General Medicine* 2007; 4(1): 16-18.

33. Fibla JJ, Brunelli A, Allen MS, Wigle D, Shen R, Nichols F, Deschamps C, Cassivi SD. Do the number and volume of surgical lung biopsies influence the diagnostic yield in interstitial lung disease? A propensity score analysis. *Archivos de Bronconeumologia* 2015; 51(2): 76-79.
34. Fibla JJ, Brunelli A, Cassivi SD, Deschamps C. Aggregate risk score for predicting mortality after surgical biopsy for interstitial lung disease. *Interact Cardiovasc Thorac Surg* 2012; 15(2): 276-279.
35. Fibla JJ, Molins L, Blanco A, Royo I, Martinez Vallina P, Martinez N, Garcia Barajas S, Gomez A, Estors M, Moldes M, Fernandez E, Xaubet A. Video-assisted thoracoscopic lung biopsy in the diagnosis of interstitial lung disease: a prospective, multi-center study in 224 patients. *Archivos de Bronconeumologia* 2012; 48(3): 81-85.
36. Fruchter O, Fridel L, El Raouf BA, Abdel-Rahman N, Rosengarten D, Kramer MR. Histological diagnosis of interstitial lung diseases by cryo-transbronchial biopsy. *Respirology* 2014; 19(5): 683-688.
37. Ganganah O, Guo SL, Chiniah M, Li YS. Efficacy and safety of cryobiopsy versus forceps biopsy for interstitial lung diseases and lung tumours: A systematic review and meta-analysis. *Respirology* 2016; 21(5): 834-841.
38. Gershman E, Fruchter O, Benjamin F, Nader AR, Rosengarten D, Rusanov V, Fridel L, Kramer MR. Safety of Cryo-Transbronchial Biopsy in Diffuse Lung Diseases: Analysis of Three Hundred Cases. *Respiration* 2015; 90(1): 40-46.
39. Gnass M, Filarecka A, Pankowski J, Soja J, Bugalho A, Szlubowski A. Transbronchial lung cryobiopsy guided by endobronchial ultrasound radial miniprobe in interstitial lung diseases: preliminary results of a prospective study. *Pol Arch Intern Med* 2018; 128(4): 259-262.
40. Griff S, Schonfeld N, Ammenwerth W, Blum TG, Grah C, Bauer TT, Gruning W, Mairinger T, Wurps H. Diagnostic yield of transbronchial cryobiopsy in non-neoplastic lung disease: a retrospective case series. *BMC pulm* 2014; 14: 171.
41. Guerra M, Miranda JA, Leal F, Vouga L. Interstitial lung disease: diagnostic accuracy and safety of surgical lung biopsy. *Rev Port Pneumol* 2009; 15(3): 433-442.
42. Hagmeyer L, Theegarten D, Wohlschlager J, Hager T, Tremml M, Herkenrath SD, Hekmat K, Heldwein M, Randerath WJ. Transbronchial cryobiopsy in fibrosing interstitial lung disease: modifications of the procedure lead to risk reduction. *Thorax* 2019; 74(7): 711-714.
43. Hagmeyer L, Theegarten D, Wohlschlager J, Tremml M, Matthes S, Priegnitz C, Randerath WJ. The role of transbronchial cryobiopsy and surgical lung biopsy in the diagnostic algorithm of interstitial lung disease. *Clin Respir J* 2016; 10(5): 589-595.
44. Han Q, Luo Q, Xie JX, Wu LL, Liao LY, Zhang XX, Chen RC. Diagnostic yield and postoperative mortality associated with surgical lung biopsy for evaluation of interstitial lung diseases: A systematic review and meta-analysis. *J Thorac Cardiovasc Surg* 2015; 149(5): 1394-1401.e1391.
45. Harari S, Cereda F, Pane F, Cavazza A, Papanikolaou N, Pelosi G, Scarioni M, Uslenghi E, Zompatori M, Caminati A. Lung Cryobiopsy for the Diagnosis of Interstitial Lung Diseases: A Series Contribution to a Debated Procedure. *Medicina (B Aires)* 2019; 55(9): 19.

46. Hernandez-Gonzalez F, Lucena CM, Ramirez J, Sanchez M, Jimenez MJ, Xaubet A, Sellares J, Agusti C. Cryobiopsy in the diagnosis of diffuse interstitial lung disease: yield and cost-effectiveness analysis. *Archivos de Bronconeumologia* 2015; 51(6): 261-267.
47. Hetzel J, Eberhardt R, Petermann C, Gesierich W, Darwiche K, Hagmeyer L, Muche R, Kreuter M, Lewis R, Ehab A, Boeckeler M, Haentschel M. Bleeding risk of transbronchial cryobiopsy compared to transbronchial forceps biopsy in interstitial lung disease - a prospective, randomized, multicentre cross-over trial. *Respiratory Research* 2019; 20(1): 140.
48. Hetzel J, Wells AU, Costabel U, Colby TV, Walsh SLF, Verschakelen J, Cavazza A, Tomassetti S, Ravaglia C, Bockeler M, Spengler W, Kreuter M, Eberhardt R, Darwiche K, Torrego A, Pajares V, Muche R, Musterle R, Horger M, Fend F, Warth A, Heusel CP, Piciucchi S, Dubini A, Theegarten D, Franquet T, Lerma E, Poletti V, Hantschel M. Transbronchial cryobiopsy increases diagnostic confidence in interstitial lung disease: a prospective multicentre trial. *European Respiratory Journal* 2020; 56(6): 12.
49. Hussein S, Elhadidy A, Amin H, Tantawy A, Negm M. Transbronchial cryobiopsy as a new tool for lung biopsies in diagnosis of diffuse parenchymal lung diseases, S. Hussein, Department of Pulmonology, Faculty of Medicine, Cairo University, Cairo, Egypt, 2020.
50. Hutchinson JP, Fogarty AW, McKeever TM, Hubbard RB. In-Hospital Mortality after Surgical Lung Biopsy for Interstitial Lung Disease in the United States. 2000 to 2011. *Am J Respir Crit Care Med* 2016; 193(10): 1161-1167.
51. Hutchinson JP, McKeever TM, Fogarty AW, Navaratnam V, Hubbard RB. Surgical lung biopsy for the diagnosis of interstitial lung disease in England: 1997-2008. *European Respiratory Journal* 2016; 48(5): 1453-1461.
52. Iftikhar IH, Alghothani L, Sardi A, Berkowitz D, Musani AI. Transbronchial Lung Cryobiopsy and Video-assisted Thoracoscopic Lung Biopsy in the Diagnosis of Diffuse Parenchymal Lung Disease. A Meta-analysis of Diagnostic Test Accuracy. *Ann Am Thorac Soc* 2017; 14(7): 1197-1211.
53. Ikeda T, Nakao A, Igata F, Kinoshita Y, Kushima H, Matsumoto T, Ishii H, Nabeshima K, Fujita M. Feasibility, utility, and safety of transbronchial cryobiopsy for interstitial lung diseases in Japan. *Multidiscip* 2021; 16(1): 731.
54. Ishie RT, Cardoso JJ, Silveira RJ, Stocco L. Video-assisted thoracoscopy for the diagnosis of diffuse parenchymal lung disease. *J Bras Pneumol* 2009; 35(3): 234-241.
55. Jeon CS, Yoon DW, Moon SM, Shin S, Cho JH, Lee SM, Ahn HJ, Kim JA, Yang M. Non-intubated video-assisted thoracoscopic lung biopsy for interstitial lung disease: a single-center experience. *Journal of Thoracic Disease* 2018; 10(6): 3262-3268.
56. Johansson KA, Marcoux VS, Ronksley PE, Ryerson CJ. Diagnostic Yield and Complications of Transbronchial Lung Cryobiopsy for Interstitial Lung Disease. A Systematic Review and Metaanalysis. *Ann Am Thorac Soc* 2016; 13(10): 1828-1838.
57. Kayatta MO, Ahmed S, Hammel JA, Fernandez F, Pickens A, Miller D, Staton G, Jr., Veerarghavan S, Force S. Surgical biopsy of suspected interstitial lung disease is superior to radiographic diagnosis. *Annals of Thoracic Surgery* 2013; 96(2): 399-401.

58. Khalil M, Cowen M, Chaudhry M, Loubani M. Single versus multiple lung biopsies for suspected interstitial lung disease. *Asian Cardiovasc Thorac Ann* 2016; 24(8): 788-791.
59. Koslow M, Edell ES, Midthun DE, Mullon JJ, Kern RM, Nelson DR, Sakata KK, Moua T, Roden AC, Yi ES, Reisenauer JS, Decker PA, Ryu JH. Bronchoscopic Cryobiopsy and Forceps Biopsy for the Diagnostic Evaluation of Diffuse Parenchymal Lung Disease in Clinical Practice. *Mayo Clinic Proceedings Innovations, Quality & Outcomes* 2020; 4(5): 565-574.
60. Kreider ME, Hansen-Flaschen J, Ahmad NN, Rossman MD, Kaiser LR, Kucharczuk JC, Shrager JB. Complications of video-assisted thoracoscopic lung biopsy in patients with interstitial lung disease. *Annals of Thoracic Surgery* 2007; 83(3): 1140-1144.
61. Kronborg-White S, Folkersen B, Rasmussen TR, Voldby N, Madsen LB, Rasmussen F, Poletti V, Bendstrup E. Introduction of cryobiopsies in the diagnostics of interstitial lung diseases - experiences in a referral center. *Eur Clin Respir J* 2017; 4(1): 1274099.
62. Kronborg-White S, Sriharan SS, Madsen LB, Folkersen B, Voldby N, Poletti V, Rasmussen TR, Bendstrup E. Integration of cryobiopsies for interstitial lung disease diagnosis is a valid and safe diagnostic strategy- experiences based on 250 biopsy procedures. *Journal of Thoracic Disease* 2021; 13(3): 1455-1465.
63. Kropski JA, Pritchett JM, Mason WR, Sivarajan L, Gleaves LA, Johnson JE, Lancaster LH, Lawson WE, Blackwell TS, Steele MP, Loyd JE, Rickman OB. Bronchoscopic cryobiopsy for the diagnosis of diffuse parenchymal lung disease. *PLoS ONE* 2013; 8(11): e78674.
64. Kurihara C, Tolly B, Dewolf A, Nader A, Kim S, Odell DD, Argento AC, Budinger GRS, Bharat A. Thoracoscopic lung biopsy under regional anesthesia for interstitial lung disease. *Regional Anesthesia and Pain Medicine* 2020.
65. Lentz RJ, Taylor TM, Kropski JA, Sandler KL, Johnson JE, Blackwell TS, Maldonado F, Rickman OB. Utility of Flexible Bronchoscopic Cryobiopsy for Diagnosis of Diffuse Parenchymal Lung Diseases. *J Bronchology Interv Pulmonol* 2018; 25(2): 88-96.
66. Lettieri CJ, Veerappan GR, Helman DL, Mulligan CR, Shorr AF. Outcomes and safety of surgical lung biopsy for interstitial lung disease. *Chest* 2005; 127(5): 1600-1605.
67. Linhas R, Marcoa R, Oliveira A, Almeida J, Neves S, Campainha S. Transbronchial lung cryobiopsy: Associated complications. *Rev Port Pneumol* 2017; 23(6): 331-337.
68. Luo Q, Han Q, Chen X, Xie J, Wu L, Chen R. The diagnosis efficacy and safety of video-assisted thoracoscopy surgery (VATS) in undefined interstitial lung diseases: a retrospective study. *Journal of Thoracic Disease* 2013; 5(3): 283-288.
69. Maldonado F, Danoff SK, Wells AU, Colby TV, Ryu JH, Liberman M, Wahidi MM, Frazer L, Hetzel J, Rickman OB, Herth FJF, Poletti V, Yarmus LB. Transbronchial Cryobiopsy for the Diagnosis of Interstitial Lung Diseases: CHEST Guideline and Expert Panel Report. *Chest* 2019; 27: 27.
70. Marcoa R, Linhas R, Apolinario D, Campainha S, Oliveira A, Nogueira C, Loureiro A, Almeida J, Costa F, Wen X, Neves S. Diagnostic yield of transbronchial lung cryobiopsy in interstitial lung diseases. *Rev Port Pneumol* 2017; 23(5): 296-298.

71. Matta A, Gupta E, Swank Z, Aragaki-Nakahodo A, Cooley J, Caudell-Stamper DN, Benzaquen S. The use of transbronchial cryobiopsy for diffuse parenchymal lung disease in critically ill patients with acute hypoxemic respiratory failure-A case series. *Clin Respir J* 2021; 18: 18.
72. Miller JD, Urschel JD, Cox G, Olak J, Young JE, Kay JM, McDonald E. A randomized, controlled trial comparing thoracoscopy and limited thoracotomy for lung biopsy in interstitial lung disease. *Annals of Thoracic Surgery* 2000; 70(5): 1647-1650.
73. Morris D, Zamvar V. The efficacy of video-assisted thoracoscopic surgery lung biopsies in patients with Interstitial Lung Disease: a retrospective study of 66 patients. *J Cardiothorac Surg* 2014; 9: 45.
74. Nagano M, Miyamoto A, Kikunaga S, Suzuki S, Takaya H, Fujii T, Fujimori S. Outcomes of Video-Assisted Thoracic Surgical Lung Biopsy for Interstitial Lung Diseases. *Ann Thorac Cardiovasc Surg* 2021; 8: 08.
75. O'Mahony AM, Burke L, Cavazza A, Maher MM, Kennedy MP, Henry MT. Transbronchial lung cryobiopsy (TBLC) in the diagnosis of interstitial lung disease: experience of first 100 cases performed under conscious sedation with flexible bronchoscope. *Irish Journal of Medical Science* 2021; 20: 20.
76. Ooi A, Iyenger S, Ferguson J, Ritchie AJ. VATS lung biopsy in suspected, diffuse interstitial lung disease provides diagnosis, and alters management strategies. *Heart Lung Circ* 2005; 14(2): 90-92.
77. Pajares V, Núñez-Delgado M, Bonet G, Pérez-Pallarés J, Martínez R, Cubero N, Zabala T, Cordovilla R, Flandes J, Disdier C, Torrego A. Transbronchial biopsy results according to diffuse interstitial lung disease classification. Cryobiopsy versus forceps: MULTICRIO study, V. Pajares, *Respiratory Medicine*, Hospital de la Santa Creu i Sant Pau, Barcelona, Spain, 2020.
78. Pajares V, Puzo C, Castillo D, Lerma E, Angeles Montero M, Ramos-Barbón D, Amor-Carro O, De Bernabé AG, Franquet T, Plaza V, Hetzel J, Sanchis J, Torrego A. Diagnostic yield of transbronchial cryobiopsy in interstitial lung disease: A randomized trial. *Respirology* 2014; 19(6): 900-906.
79. Pannu J, Roller LJ, Maldonado F, Lentz RJ, Chen H, Rickman OB. Transbronchial cryobiopsy for diffuse parenchymal lung disease: 30- and 90-day mortality. *European Respiratory Journal* 2019; 54(4).
80. Pastre J, Khandhar S, Barnett S, Ksovreli I, Mani H, Brown AW, Shlobin OA, Ahmad K, Khangoora V, Aryal S, Morris DL, King CS, Nathan SD. Surgical Lung Biopsy for Interstitial Lung Disease. Safety and Feasibility at a Tertiary Referral Center. *Ann Am Thorac Soc* 2021; 18(3): 460-467.
81. Pompeo E, Rogliani P, Atinkaya C, Guerrera F, Ruffini E, Iñiguez-Garcia MA, Peer M, Voltolini L, Caviezel C, Weder W, Opitz I, Cavalli F, Sorge R. Nonintubated surgical biopsy of undetermined interstitial lung disease: A multicentre outcome analysis. *Interactive Cardiovascular and Thoracic Surgery* 2019; 28(5): 744-750.
82. Pompeo E, Rogliani P, Cristino B, Schillaci O, Novelli G, Saltini C. Awake thoracoscopic biopsy of interstitial lung disease. *Annals of Thoracic Surgery* 2013; 95(2): 445-452.
83. Qureshi RA, Ahmed TA, Grayson AD, Soorae AS, Drakeley MJ, Page RD. Does lung biopsy help patients with interstitial lung disease? *Eur J Cardiothorac Surg* 2002; 21(4): 621-626; discussion 626.
84. Raghu G, Remy-Jardin M, Myers JL, Richeldi L, Ryerson CJ, Lederer DJ, Behr J, Cottin V, Danoff SK, Morell F, Flaherty KR, Wells A, Martinez FJ, Azuma A, Bice TJ, Bouros D, Brown KK, Collard HR, Duggal A, Galvin L, Inoue Y, Gislis Jenkins R, Johkoh T, Kazerooni EA, Kitaichi M, Knight SL, Mansour G, Nicholson AG, Pipavath SNJ, Buendía-Roldán I, Selman M, Travis WD, Walsh S, Wilson KC. Diagnosis of idiopathic pulmonary fibrosis An



Official ATS/ERS/JRS/ALAT Clinical practice guideline. American Journal of Respiratory and Critical Care Medicine 2018; 198(5): e44-e68.

85. Ramaswamy A, Homer R, Killam J, Pisani MA, Murphy TE, Araujo K, Puchalski J. Comparison of Transbronchial and Cryobiopsies in Evaluation of Diffuse Parenchymal Lung Disease. J Bronchology Interv Pulmonol 2016; 23(1): 14-21.
86. Ravaglia C, Bonifazi M, Wells AU, Tomassetti S, Gurioli C, Piciucchi S, Dubini A, Tantalocco P, Sanna S, Negri E, Tramacere I, Ventura VA, Cavazza A, Rossi A, Chilosi M, La Vecchia C, Gasparini S, Poletti V. Safety and Diagnostic Yield of Transbronchial Lung Cryobiopsy in Diffuse Parenchymal Lung Diseases: A Comparative Study versus Video-Assisted Thoracoscopic Lung Biopsy and a Systematic Review of the Literature. Respiration 2016; 91(3): 215-227.
87. Ravaglia C, Wells AU, Tomassetti S, Dubini A, Cavazza A, Piciucchi S, Sverzellati N, Gurioli C, Gurioli C, Costabel U, Tantalocco P, Ryu JH, Chilosi M, Poletti V. Transbronchial Lung Cryobiopsy in Diffuse Parenchymal Lung Disease: Comparison between Biopsy from 1 Segment and Biopsy from 2 Segments - Diagnostic Yield and Complications. Respiration 2017; 93(4): 285-292.
88. Ravaglia C, Wells AU, Tomassetti S, Gurioli C, Gurioli C, Dubini A, Cavazza A, Colby TV, Piciucchi S, Puglisi S, Bosi M, Poletti V. Diagnostic yield and risk/benefit analysis of trans-bronchial lung cryobiopsy in diffuse parenchymal lung diseases: a large cohort of 699 patients. BMC pulm 2019; 19(1): 16.
89. Rocco G, Khalil M, Jutley R. Uniportal video-assisted thoracoscopic surgery wedge lung biopsy in the diagnosis of interstitial lung diseases. J Thorac Cardiovasc Surg 2005; 129(4): 947-948.
90. Romagnoli M, Colby TV, Berthet JP, Gamez AS, Mallet JP, Serre I, Cancellieri A, Cavazza A, Solovei L, Dell'Amore A, Dolci G, Guerrieri A, Reynaud P, Bommart S, Zompatori M, Dalpiaz G, Nava S, Trisolini R, Suehs CM, Vachier I, Molinari N, Bourdin A. Poor Concordance between Sequential Transbronchial Lung Cryobiopsy and Surgical Lung Biopsy in the Diagnosis of Diffuse Interstitial Lung Diseases. Am J Respir Crit Care Med 2019; 199(10): 1249-1256.
91. Rotolo N, Imperatori A, Dominioni L, Facchini A, Conti V, Castiglioni M, Spanevello A. Efficacy and safety of surgical lung biopsy for interstitial disease. Experience of 161 consecutive patients from a single institution in Italy. Sarcoidosis Vasc Diffuse Lung Dis 2015; 32(3): 251-258.
92. Rotolo N, Imperatori A, Poli A, Nardecchia E, Castiglioni M, Cattoni M, Dominioni L. Assessment of the aggregate risk score to predict mortality after surgical biopsy for interstitial lung disease. Eur J Cardiothorac Surg 2015; 47(6): 1027-1030; discussion 1030.
93. Samejima J, Tajiri M, Ogura T, Baba T, Omori T, Tsuboi M, Masuda M. Thoracoscopic lung biopsy in 285 patients with diffuse pulmonary disease. Asian Cardiovasc Thorac Ann 2015; 23(2): 191-197.
94. Samitas K, Kolilekas L, Vamvakaris I, Gkogkou C, Filippousis P, Gaga M, Zervas E. Introducing transbronchial cryobiopsies in diagnosing diffuse parenchymal lung diseases in Greece: Implementing training into clinical practice. PLoS ONE 2019; 14(6): e0217554.
95. Sethi J, Ali MS, Mohananey D, Nanchal R, Maldonado F, Musani A. Are Transbronchial Cryobiopsies Ready for Prime Time?: A Systematic Review and Meta-Analysis. J Bronchology Interv Pulmonol 2019; 26(1): 22-32.

96. Shafiek H, Elbially S, El Achy SN, Gad AYS. Transbronchial cryobiopsy validity in diagnosing diffuse parenchymal lung diseases in Egyptian population. *J Multidiscip Healthc* 2019; 12: 719-726.
97. Sharp C, McCabe M, Adamali H, Medford AR. Use of transbronchial cryobiopsy in the diagnosis of interstitial lung disease-a systematic review and cost analysis. *Qjm* 2017; 110(4): 207-214.
98. She S, Steinfert DP, Ing AJ, Williamson JP, Leong P, Irving LB, Jennings BR, Saghaie T. Transbronchial Cryobiopsy in Interstitial Lung Disease: Safety of a Standardized Procedure. *J Bronchology Interv Pulmonol* 2020; 27(1): 36-41.
99. Sheth JS, Belperio JA, Fishbein MC, Kazerooni EA, Lagstein A, Murray S, Myers JL, Simon RH, Sisson TH, Sundaram B, White ES, Xia M, Zisman D, Flaherty KR. Utility of Transbronchial vs Surgical Lung Biopsy in the Diagnosis of Suspected Fibrotic Interstitial Lung Disease. *Chest* 2017; 151(2): 389-399.
100. Shkeiri R, Schneer S, Avarmovich A, Adir Y. Transbronchial Cryobiopsy in Diffuse Parenchymal Lung Diseases in a Community Medical Center. *Israel Medical Association Journal: Imaj* 2020; 22(12): 781-783.
101. Sigurdsson MI, Isaksson HJ, Gudmundsson G, Gudbjartsson T. Diagnostic surgical lung biopsies for suspected interstitial lung diseases: a retrospective study. *Annals of Thoracic Surgery* 2009; 88(1): 227-232.
102. Sonobe M, Handa T, Tanizawa K, Sato M, Sato T, Chen F, Omasa M, Bando T, Date H, Mishima M. Videothoracoscopy-assisted surgical lung biopsy for interstitial lung diseases. *Gen Thorac Cardiovasc Surg* 2014; 62(6): 376-382.
103. Sriprasart T, Aragaki A, Baughman R, Wikenheiser-Brokamp K, Khanna G, Tanase D, Kirschner M, Benzaquen S. A Single US Center Experience of Transbronchial Lung Cryobiopsy for Diagnosing Interstitial Lung Disease With a 2-Scope Technique. *J Bronchology Interv Pulmonol* 2017; 24(2): 131-135.
104. Sugino K, Otsuka H, Matsumoto Y, Nakamura Y, Matsumoto K, Azuma Y, Makino T, Iyoda A, Shibuya K, Homma S. The role of video-assisted thoracoscopic surgery in the diagnosis of interstitial lung disease. *Sarcoidosis Vasculitis and Diffuse Lung Diseases* 2019; 36(2): 148-156.
105. Takamori S, Hayashi A, Matsuo T, Mitsuoka M, Tanigawa H, Fukunaga M, Miwa K, Sueyasu Y, Hotta M, Shirouzu K. Thoracoscopic lung biopsy for diffuse infiltrative lung disease. *Kurume Med J* 2000; 47(4): 263-265.
106. Theegarten D, Muller HM, Bonella F, Wohlschlaeger J, Costabel U. Diagnostic approach to interstitial pneumonias in a single centre: report on 88 cases. *Diagn Pathol* 2012; 7: 160.
107. Tomassetti S, Ravaglia C, Wells AU, Cavazza A, Colby TV, Rossi G, Ley B, Ryu JH, Puglisi S, Arcadu A, Marchi M, Sultani F, Martinello S, Donati L, Gurioli C, Gurioli C, Tantalocco P, Hetzel J, Dubini A, Piciocchi S, Klersy C, Lavorini F, Poletti V. Prognostic value of transbronchial lung cryobiopsy for the multidisciplinary diagnosis of idiopathic pulmonary fibrosis: a retrospective validation study. *Lancet Respir Med* 2020; 8(8): 786-794.
108. Tomassetti S, Wells AU, Costabel U, Cavazza A, Colby TV, Rossi G, Sverzellati N, Carloni A, Carretta E, Buccioli M, Tantalocco P, Ravaglia C, Gurioli C, Dubini A, Piciocchi S, Ryu JH, Poletti V. Bronchoscopic Lung Cryobiopsy Increases Diagnostic Confidence in the Multidisciplinary Diagnosis of Idiopathic Pulmonary Fibrosis. *Am J Respir Crit Care Med* 2016; 193(7): 745-752.
109. Troy LK, Grainge C, Corte TJ, Williamson JP, Vally MP, Cooper WA, Mahar A, Myers JL, Lai S, Mulyadi E, Torzillo PJ, Phillips MJ, Jo HE, Webster SE, Lin QT, Rhodes JE, Salamonsen M, Wrobel JP, Harris B, Don G, Wu

- PJC, Ng BJ, Oldmeadow C, Raghu G, Lau EMT, Cryobiopsy versus Open Lung biopsy in the Diagnosis of Interstitial lung disease alliance I. Diagnostic accuracy of transbronchial lung cryobiopsy for interstitial lung disease diagnosis (COLDICE): a prospective, comparative study. *Lancet Respir Med* 2020; 8(2): 171-181.
110. Turan D, Ugur Chousein EG, Koc AS, Cortuk M, Yildirim Z, Demirkol B, Ozgul MA, Cinarka H, Akalin N, Yardimci AH, Cetinkaya E. Transbronchial cryobiopsy for diagnosing parenchymal lung diseases: real-life experience from a tertiary referral center. *Sarcoidosis Vasc Diffuse Lung Dis* 2021; 38(1): e2021004.
  111. Ussavarungsi K, Kern RM, Roden AC, Ryu JH, Edell ES. Transbronchial Cryobiopsy in Diffuse Parenchymal Lung Disease: Retrospective Analysis of 74 Cases. *Chest* 2017; 151(2): 400-408.
  112. Vaszar LT, Larsen BT, Swanson KL, Ryu JH, Tazelaar HD. Diagnostic utility of surgical lung biopsies in elderly patients with indeterminate interstitial lung disease. *Respirology* 2018; 23(5): 507-511.
  113. Viglietta L, Inchingolo R, Pavano C, Tomassetti S, Piciucchi S, Smargiassi A, Ravaglia C, Dubini A, Gurioli C, Gurioli C, Poletti V. Ultrasonography for the Diagnosis of Pneumothorax after Transbronchial Lung Cryobiopsy in Diffuse Parenchymal Lung Diseases. *Respiration* 2017; 94(2): 232-236.
  114. Wälscher J, Gro B, Eberhardt R, Heussel CP, Eichinger M, Warth A, Lasitschka F, Herth FJF, Kreuter M. Transbronchial Cryobiopsies for Diagnosing Interstitial Lung Disease: Real-Life Experience from a Tertiary Referral Center for Interstitial Lung Disease. *Respiration* 2019; 97(4): 348-354.
  115. Wijmans L, Bonta PI, Rocha-Pinto R, de Bruin DM, Brinkman P, Jonkers RE, Roelofs J, Poletti V, Hetzel J, Annema JT. Confocal Laser Endomicroscopy as a Guidance Tool for Transbronchial Lung Cryobiopsies in Interstitial Lung Disorder. *Respiration* 2019; 97(3): 259-263.
  116. Yamaguchi M, Yoshino I, Suemitsu R, Osoegawa A, Kameyama T, Tagawa T, Fukuyama S, Maehara Y. Elective video-assisted thoracoscopic lung biopsy for interstitial lung disease. *Asian Cardiovasc Thorac Ann* 2004; 12(1): 65-68.
  117. Yi E, Lee JH, Lee JH, Chung JH, Lee Y, Lee S. Perioperative risk factors in surgical lung biopsy for the diagnosis of interstitial lung disease: a single-centre experience. *ANZ Journal of Surgery* 2021; 91(3): 291-297.
  118. Zhang D, Liu Y. Surgical lung biopsies in 418 patients with suspected interstitial lung disease in China. *Intern Med* 2010; 49(12): 1097-1102.
  119. Zhou G, Ren Y, Li J, Yang T, Su N, Zhao L, Wang S, Wang D, Li Y, Tian Z, Liu R, Dai H, Wang C. The effect of 1.9-mm versus 2.4-mm probes in transbronchial cryobiopsies for interstitial lung diseases: a prospective analysis. *Annals of Translational Medicine* 2021; 9(1): 20.

### **Flowchart PICO question 2:**

*In patients with undiagnosed ILD not considered eligible to undergo SLB, does TBLC increase the diagnostic confidence of the multidisciplinary team discussion?*

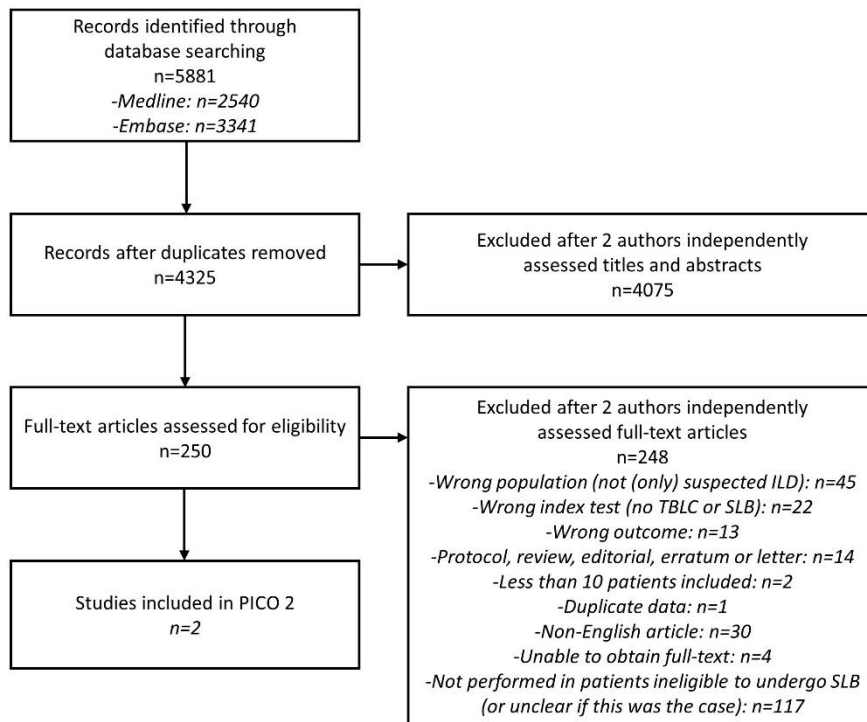

### **Final included PICO question 2 (n=2):**

1. Bondue B, Schlossmacher P, Allou N, Gazaille V, Taton O, Gevenois PA, Vandergheynst F, Remmelink M, Leduc D. Trans-bronchial lung cryobiopsy in patients at high-risk of complications. BMC pulm 2021; 21(1): 135.
2. Matta A, Gupta E, Swank Z, Aragaki-Nakahodo A, Cooley J, Caudell-Stamper DN, Benzaquen S. The use of transbronchial cryobiopsy for diffuse parenchymal lung disease in critically ill patients with acute hypoxemic respiratory failure-A case series. Clin Respir J 2021; 18: 18.

### Flowchart PICO question 3:

*In patients with undiagnosed ILD and a non-informative TBLC, is step-up SLB or second TBLC a valid add-on test?*

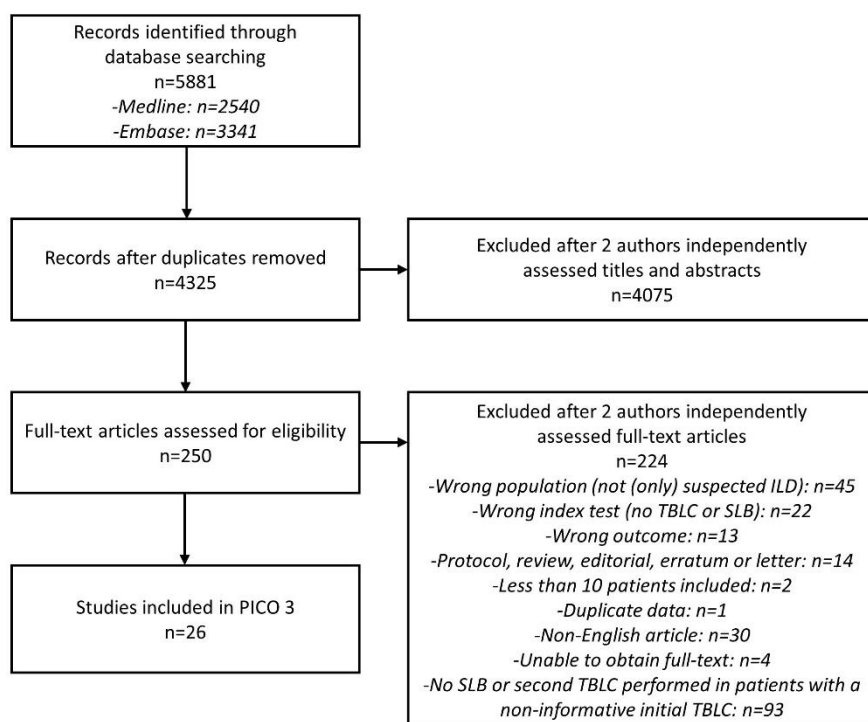

### Final included PICO question 3 (n=26):

1. Babiak A, Hetzel J, Krishna G, Fritz P, Moeller P, Balli T, Hetzel M. Transbronchial cryobiopsy: A new tool for lung biopsies. *Respiration* 2009; 78(2): 203-208.
2. Bango-Alvarez A, Ariza-Prota M, Torres-Rivas H, Fernandez-Fernandez L, Prieto A, Sanchez I, Gil M, Pando-Sandoval A. Transbronchial cryobiopsy in interstitial lung disease: experience in 106 cases - how to do it. *ERJ open res* 2017; 3(1).
3. Bondue B, Leduc D, Froidure A, Pieters T, Taton O, Heinen V, Alexander P, Hoton D, Dome F, Rimmelink M. Usefulness of surgical lung biopsies after cryobiopsies when pathological results are inconclusive or show a pattern suggestive of a nonspecific interstitial pneumonia. *Respiratory Research* 2020; 21(1): 231.
4. Cascante JA, Cebollero P, Herrero S, Yague A, Echegoyen A, Elizalde J, Hueto J. Transbronchial Cryobiopsy in Interstitial Lung Disease: Are We on the Right Path? *J Bronchology Interv Pulmonol* 2016; 23(3): 204-209.
5. Cho R, Zamora F, Gibson H, Dincer HE. Transbronchial Lung Cryobiopsy in the Diagnosis of Interstitial Lung Disease: A Retrospective Single-center Experience. *J Bronchology Interv Pulmonol* 2019; 26(1): 15-21.
6. Fruchter O, Fridel L, El Raouf BA, Abdel-Rahman N, Rosengarten D, Kramer MR. Histological diagnosis of interstitial lung diseases by cryo-transbronchial biopsy. *Respirology* 2014; 19(5): 683-688.
7. Hagmeyer L, Theegarten D, Wohlschlagel J, Hager T, Tremel M, Herkenrath SD, Hekmat K, Heldwein M, Randerath WJ. Transbronchial cryobiopsy in fibrosing interstitial lung disease: modifications of the procedure lead to risk reduction. *Thorax* 2019; 74(7): 711-714.

8. Hagmeyer L, Theegarten D, Wohlschlager J, Tremel M, Matthes S, Priegnitz C, Randerath WJ. The role of transbronchial cryobiopsy and surgical lung biopsy in the diagnostic algorithm of interstitial lung disease. *Clin Respir J* 2016; 10(5): 589-595.
9. Hernandez-Gonzalez F, Lucena CM, Ramirez J, Sanchez M, Jimenez MJ, Xaubet A, Sellares J, Agusti C. Cryobiopsy in the diagnosis of diffuse interstitial lung disease: yield and cost-effectiveness analysis. *Archivos de Bronconeumologia* 2015; 51(6): 261-267.
10. Hetzel J, Wells AU, Costabel U, Colby TV, Walsh SLF, Verschakelen J, Cavazza A, Tomassetti S, Ravaglia C, Bockeler M, Spengler W, Kreuter M, Eberhardt R, Darwiche K, Torrego A, Pajares V, Muche R, Musterle R, Horger M, Fend F, Warth A, Heusel CP, Piciucchi S, Dubini A, Theegarten D, Franquet T, Lerma E, Poletti V, Hantschel M. Transbronchial cryobiopsy increases diagnostic confidence in interstitial lung disease: a prospective multicentre trial. *European Respiratory Journal* 2020; 56(6): 12.
11. Koslow M, Edell ES, Midthun DE, Mullon JJ, Kern RM, Nelson DR, Sakata KK, Moua T, Roden AC, Yi ES, Reisenauer JS, Decker PA, Ryu JH. Bronchoscopic Cryobiopsy and Forceps Biopsy for the Diagnostic Evaluation of Diffuse Parenchymal Lung Disease in Clinical Practice. *Mayo Clinic Proceedings Innovations, Quality & Outcomes* 2020; 4(5): 565-574.
12. Kronborg-White S, Sritharan SS, Madsen LB, Folkersen B, Voldby N, Poletti V, Rasmussen TR, Bendstrup E. Integration of cryobiopsies for interstitial lung disease diagnosis is a valid and safe diagnostic strategy-experiences based on 250 biopsy procedures. *Journal of Thoracic Disease* 2021; 13(3): 1455-1465.
13. Kropski JA, Pritchett JM, Mason WR, Sivarajan L, Gleaves LA, Johnson JE, Lancaster LH, Lawson WE, Blackwell TS, Steele MP, Loyd JE, Rickman OB. Bronchoscopic cryobiopsy for the diagnosis of diffuse parenchymal lung disease. *PLoS ONE* 2013; 8(11): e78674.
14. Lentz RJ, Taylor TM, Kropski JA, Sandler KL, Johnson JE, Blackwell TS, Maldonado F, Rickman OB. Utility of Flexible Bronchoscopic Cryobiopsy for Diagnosis of Diffuse Parenchymal Lung Diseases. *J Bronchology Interv Pulmonol* 2018; 25(2): 88-96.
15. Marcoa R, Linhas R, Apolinario D, Campainha S, Oliveira A, Nogueira C, Loureiro A, Almeida J, Costa F, Wen X, Neves S. Diagnostic yield of transbronchial lung cryobiopsy in interstitial lung diseases. *Rev Port Pneumol* 2017; 23(5): 296-298.
16. O'Mahony AM, Burke L, Cavazza A, Maher MM, Kennedy MP, Henry MT. Transbronchial lung cryobiopsy (TBLC) in the diagnosis of interstitial lung disease: experience of first 100 cases performed under conscious sedation with flexible bronchoscope. *Irish Journal of Medical Science* 2021; 20: 20.
17. Ramaswamy A, Homer R, Killam J, Pisani MA, Murphy TE, Araujo K, Puchalski J. Comparison of Transbronchial and Cryobiopsies in Evaluation of Diffuse Parenchymal Lung Disease. *J Bronchology Interv Pulmonol* 2016; 23(1): 14-21.
18. Ravaglia C, Wells AU, Tomassetti S, Gurioli C, Gurioli C, Dubini A, Cavazza A, Colby TV, Piciucchi S, Puglisi S, Bosi M, Poletti V. Diagnostic yield and risk/benefit analysis of trans-bronchial lung cryobiopsy in diffuse parenchymal lung diseases: a large cohort of 699 patients. *BMC pulm* 2019; 19(1): 16.
19. Romagnoli M, Colby TV, Berthet JP, Gamez AS, Mallet JP, Serre I, Cancellieri A, Cavazza A, Solovei L, Dell'Amore A, Dolci G, Guerrieri A, Reynaud P, Bommart S, Zompatori M, Dalpiaz G, Nava S, Trisolini R, Suehs

CM, Vachier I, Molinari N, Bourdin A. Poor Concordance between Sequential Transbronchial Lung Cryobiopsy and Surgical Lung Biopsy in the Diagnosis of Diffuse Interstitial Lung Diseases. *Am J Respir Crit Care Med* 2019; 199(10): 1249-1256.

20. Samitas K, Kolilekas L, Vamvakaris I, Gkogkou C, Filippousis P, Gaga M, Zervas E. Introducing transbronchial cryobiopsies in diagnosing diffuse parenchymal lung diseases in Greece: Implementing training into clinical practice. *PLoS ONE* 2019; 14(6): e0217554.

21. Shkeiri R, Schneer S, Avarmovich A, Adir Y. Transbronchial Cryobiopsy in Diffuse Parenchymal Lung Diseases in a Community Medical Center. *Israel Medical Association Journal: Imaj* 2020; 22(12): 781-783.

22. Troy LK, Grainge C, Corte TJ, Williamson JP, Vallely MP, Cooper WA, Mahar A, Myers JL, Lai S, Mulyadi E, Torzillo PJ, Phillips MJ, Jo HE, Webster SE, Lin QT, Rhodes JE, Salamonsen M, Wrobel JP, Harris B, Don G, Wu PJC, Ng BJ, Oldmeadow C, Raghu G, Lau EMT, Cryobiopsy versus Open Lung biopsy in the Diagnosis of Interstitial lung disease alliance I. Diagnostic accuracy of transbronchial lung cryobiopsy for interstitial lung disease diagnosis (COLDICE): a prospective, comparative study. *Lancet Respir Med* 2020; 8(2): 171-181.

23. Turan D, Ugur Chousein EG, Koc AS, Cortuk M, Yildirim Z, Demirkol B, Ozgul MA, Cinarka H, Akalin N, Yardimci AH, Cetinkaya E. Transbronchial cryobiopsy for diagnosing parenchymal lung diseases: real-life experience from a tertiary referral center. *Sarcoidosis Vasc Diffuse Lung Dis* 2021; 38(1): e2021004.

24. Ussavarungsi K, Kern RM, Roden AC, Ryu JH, Edell ES. Transbronchial Cryobiopsy in Diffuse Parenchymal Lung Disease: Retrospective Analysis of 74 Cases. *Chest* 2017; 151(2): 400-408.

25. Wälscher J, Gro B, Eberhardt R, Heussel CP, Eichinger M, Warth A, Lasitschka F, Herth FJF, Kreuter M. Transbronchial Cryobiopsies for Diagnosing Interstitial Lung Disease: Real-Life Experience from a Tertiary Referral Center for Interstitial Lung Disease. *Respiration* 2019; 97(4): 348-354.

26. Zaizen Y, Kohashi Y, Kuroda K, Tabata K, Kitamura Y, Hebisawa A, Saito Y, Fukuoka J. Concordance between sequential transbronchial lung cryobiopsy and surgical lung biopsy in patients with diffuse interstitial lung disease. *Diagn Pathol* 2019; 14(1): 131.

#### **Flowchart PICO question 4:**

*Is formal training in TBLC recommended to optimize diagnostic yield and minimize adverse events in patients with undiagnosed ILD?*

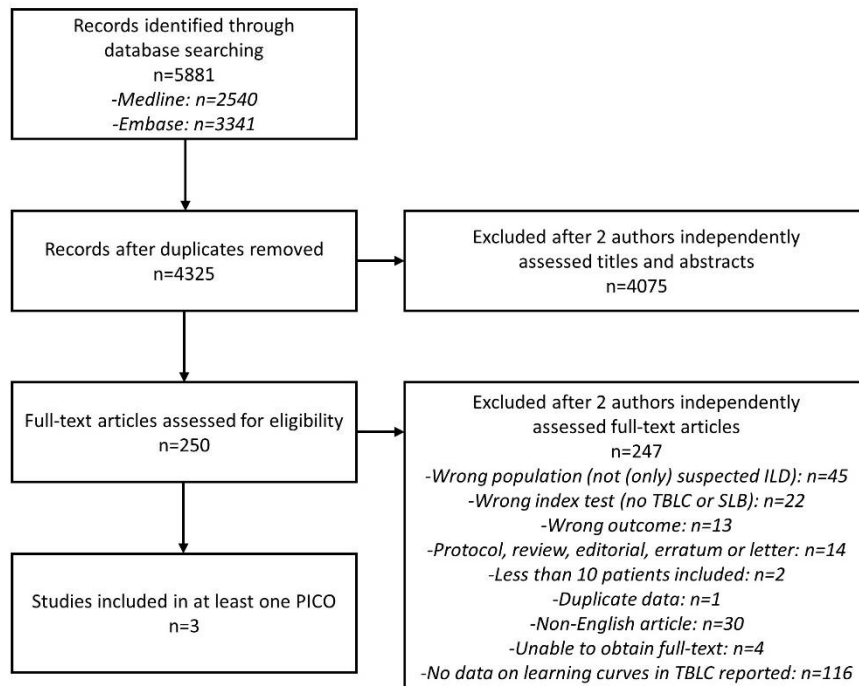

#### **Final included PICO question 4 (n=3):**

1. Almeida LM, Lima B, Mota PC, Melo N, Magalhaes A, Pereira JM, Moura CS, Guimaraes S, Morais A. Learning curve for transbronchial lung cryobiopsy in diffuse lung disease. Rev Port Pneumol 2017; 22: 22.
2. Davidsen JR, Skov IR, Louw IG, Laursen CB. Implementation of transbronchial lung cryobiopsy in a tertiary referral center for interstitial lung diseases: a cohort study on diagnostic yield, complications, and learning curves. BMC pulm 2021; 21(1): 67.
3. Kronborg-White S, Folkersen B, Rasmussen TR, Voldby N, Madsen LB, Rasmussen F, Poletti V, Bendstrup E. Introduction of cryobiopsies in the diagnostics of interstitial lung diseases - experiences in a referral center. Eur Clin Respir J 2017; 4(1): 1274099.



**Flowchart narrative question 1:**

*Are there specific HRCT findings which would lead to TBLC as the first choice for biopsy?*

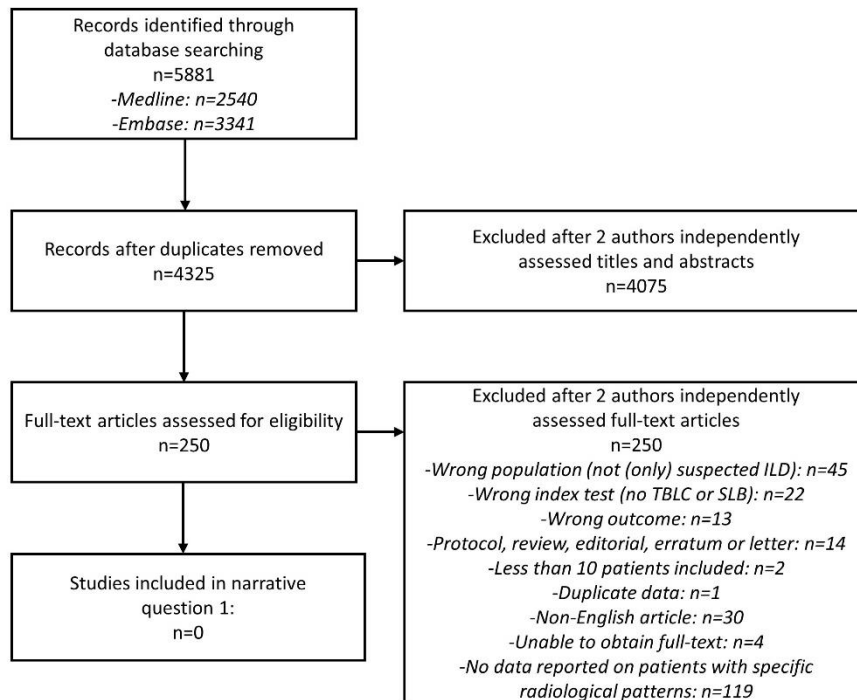

**Final included narrative question 1 (n=0):**

No studies included.

### Flowchart narrative question 2:

What are the procedural risks of TBLC in patients with undiagnosed ILD?

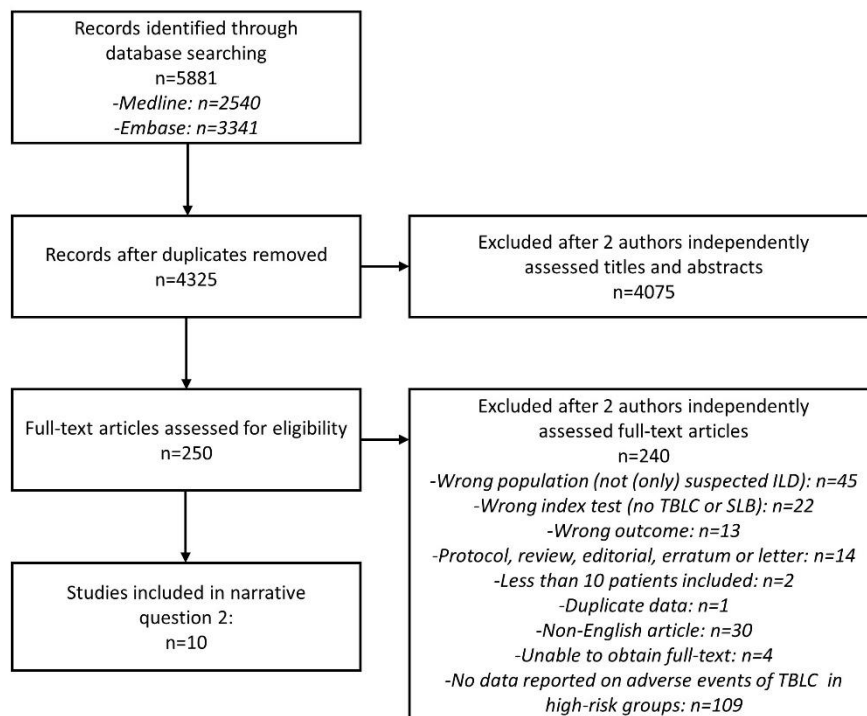

### Final included narrative question 2 (n=10):

1. Bondue B, Schlossmacher P, Allou N, Gazaille V, Taton O, Gevenois PA, Vanderghyest F, Rummelink M, Leduc D. Trans-bronchial lung cryobiopsy in patients at high-risk of complications. BMC pulm 2021; 21(1): 135.
2. Cooley J, Balestra R, Aragaki-Nakahodo AA, Caudell Stamper DN, Sriprasart T, Swank Z, Baughman RP, Benzaquen S. Safety of performing transbronchial lung cryobiopsy on hospitalized patients with interstitial lung disease. Respir Med 2018; 140: 71-76.
3. Gershman E, Fruchter O, Benjamin F, Nader AR, Rosengarten D, Rusanov V, Fridel L, Kramer MR. Safety of Cryo-Transbronchial Biopsy in Diffuse Lung Diseases: Analysis of Three Hundred Cases. Respiration 2015; 90(1): 40-46.
4. Hetzel J, Eberhardt R, Petermann C, Gesierich W, Darwiche K, Hagmeyer L, Muche R, Kreuter M, Lewis R, Ehab A, Boeckeler M, Haentschel M. Bleeding risk of transbronchial cryobiopsy compared to transbronchial forceps biopsy in interstitial lung disease - a prospective, randomized, multicentre cross-over trial. Respiratory Research 2019; 20(1): 140.
5. Kronborg-White S, Sriharan SS, Madsen LB, Folkersen B, Voldby N, Poletti V, Rasmussen TR, Bendstrup E. Integration of cryobiopsies for interstitial lung disease diagnosis is a valid and safe diagnostic strategy- experiences based on 250 biopsy procedures. Journal of Thoracic Disease 2021; 13(3): 1455-1465.

6. Kropski JA, Pritchett JM, Mason WR, Sivarajan L, Gleaves LA, Johnson JE, Lancaster LH, Lawson WE, Blackwell TS, Steele MP, Loyd JE, Rickman OB. Bronchoscopic cryobiopsy for the diagnosis of diffuse parenchymal lung disease. *PLoS ONE* 2013; 8(11): e78674.
7. Matta A, Gupta E, Swank Z, Aragaki-Nakahodo A, Cooley J, Caudell-Stamper DN, Benzaquen S. The use of transbronchial cryobiopsy for diffuse parenchymal lung disease in critically ill patients with acute hypoxemic respiratory failure-A case series. *Clin Respir J* 2021; 18: 18.
8. Pannu J, Roller LJ, Maldonado F, Lentz RJ, Chen H, Rickman OB. Transbronchial cryobiopsy for diffuse parenchymal lung disease: 30- and 90-day mortality. *European Respiratory Journal* 2019; 54(4).
9. Ravaglia C, Wells AU, Tomassetti S, Gurioli C, Gurioli C, Dubini A, Cavazza A, Colby TV, Piciocchi S, Puglisi S, Bosi M, Poletti V. Diagnostic yield and risk/benefit analysis of trans-bronchial lung cryobiopsy in diffuse parenchymal lung diseases: a large cohort of 699 patients. *BMC pulm* 2019; 19(1): 16.
10. She S, Steinfort DP, Ing AJ, Williamson JP, Leong P, Irving LB, Jennings BR, Saghaie T. Transbronchial Cryobiopsy in Interstitial Lung Disease: Safety of a Standardized Procedure. *J Bronchology Interv Pulmonol* 2020; 27(1): 36-41.
