# Supplementary material
Source: HighWire-hosted journal article supplement (https://erj.ersjournals.com/content/60/5/2200425)
Supplement: inline-supplementary-material-9 [file inline-supplementary-material-9.pdf]

## **Appendix 9:** PICO question 3 evidence synthesis

*Tables and figures included in this appendix:*

**Table 1:** QUADAS-2 assessment

**Table 2:** Diagnostic yield, (change in) diagnostic confidence, and adverse events in studies evaluating SLB or second TBLC in ILD patients with an non-informative initial TBLC

**Figure 1:** Meta-analysis of diagnostic yield of SLB in ILD patients with an non-informative initial TBLC

**Table 4:** Evidence to decision framework for PICO question 3

**Table 1:** QUADAS-2 assessment

| Author                | Q1a.1<br>Was a consecutive or random sample of patients enrolled? | Q1a.2<br>Was a case-control design avoided? | Q1a.3<br>Did the study avoid inappropriate exclusions? | Q1a.4<br>Was the data collection prospective? | Could the selection of patients have introduced bias? | Q1b<br>Are there concerns that the included patients do not match the review question? | Q2b<br>Are there concerns that the index test, its conduct, or its interpretation differ from the review question? | Q4a.4<br>Were all patients included in the analysis (2x2 table)? | Could the patient flow have introduced bias? |
|-----------------------|-------------------------------------------------------------------|---------------------------------------------|--------------------------------------------------------|-----------------------------------------------|-------------------------------------------------------|----------------------------------------------------------------------------------------|--------------------------------------------------------------------------------------------------------------------|------------------------------------------------------------------|----------------------------------------------|
| Babiak, A             | Yes                                                               | Yes                                         | Unclear                                                | No                                            | Yes                                                   | Unclear                                                                                | No                                                                                                                 | Yes                                                              | No                                           |
| Bango-Álvarez, A      | Unclear                                                           | Yes                                         | Unclear                                                | Yes                                           | Unclear                                               | Yes                                                                                    | No                                                                                                                 | Yes                                                              | No                                           |
| Bondue, B             | Unclear                                                           | Yes                                         | Unclear                                                | Yes                                           | Unclear                                               | Unclear                                                                                | No                                                                                                                 | No                                                               | Yes                                          |
| Cascante, J           | Yes                                                               | Yes                                         | Yes                                                    | Yes                                           | No                                                    | Yes                                                                                    | No                                                                                                                 | No                                                               | Yes                                          |
| Cho, R                | Unclear                                                           | Yes                                         | Unclear                                                | No                                            | Yes                                                   | Unclear                                                                                | No                                                                                                                 | Unclear                                                          | Unclear                                      |
| Fruchter, O           | Yes                                                               | Yes                                         | Unclear                                                | No                                            | Yes                                                   | Unclear                                                                                | No                                                                                                                 | No                                                               | Yes                                          |
| Hagmeyer, L (2016)    | Unclear                                                           | Yes                                         | Unclear                                                | No                                            | Yes                                                   | Unclear                                                                                | No                                                                                                                 | Unclear                                                          | Unclear                                      |
| Hagmeyer, L (2019)    | Unclear                                                           | Yes                                         | Yes                                                    | Yes                                           | Unclear                                               | No                                                                                     | No                                                                                                                 | No                                                               | Yes                                          |
| Hernandez-Gonzalez, F | Unclear                                                           | Yes                                         | Unclear                                                | No                                            | Yes                                                   | Yes                                                                                    | No                                                                                                                 | No                                                               | Yes                                          |
| Hetzel, J             | Yes                                                               | Yes                                         | Unclear                                                | Yes                                           | Unclear                                               | Unclear                                                                                | No                                                                                                                 | No                                                               | Yes                                          |
| Koslow, M             | Unclear                                                           | Yes                                         | Unclear                                                | No                                            | Yes                                                   | Unclear                                                                                | No                                                                                                                 | No                                                               | Yes                                          |
| Kronborg-White, S     | Unclear                                                           | Yes                                         | Unclear                                                | Yes                                           | Unclear                                               | Unclear                                                                                | No                                                                                                                 | No                                                               | Yes                                          |
| Kropski, J            | Unclear                                                           | Yes                                         | Unclear                                                | No                                            | Yes                                                   | Unclear                                                                                | No                                                                                                                 | Unclear                                                          | Unclear                                      |
| Lentz, R              | Yes                                                               | Yes                                         | Unclear                                                | No                                            | Yes                                                   | Unclear                                                                                | No                                                                                                                 | No                                                               | Yes                                          |
| Marcoa, R             | Yes                                                               | Yes                                         | Unclear                                                | Yes                                           | Unclear                                               | Yes                                                                                    | No                                                                                                                 | No                                                               | Yes                                          |
| O'Mahony              | Yes                                                               | Yes                                         | Unclear                                                | No                                            | Yes                                                   | Yes                                                                                    | No                                                                                                                 | No                                                               | Yes                                          |
| Ramaswamy, A          | Yes                                                               | Yes                                         | Unclear                                                | No                                            | Yes                                                   | Unclear                                                                                | No                                                                                                                 | Unclear                                                          | Unclear                                      |
| Ravaglia, C (2019)    | Unclear                                                           | Yes                                         | Unclear                                                | No                                            | Yes                                                   | Unclear                                                                                | No                                                                                                                 | Yes                                                              | No                                           |
| Romagnoli, M          | Yes                                                               | Yes                                         | Yes                                                    | Yes                                           | No                                                    | No                                                                                     | No                                                                                                                 | Yes                                                              | No                                           |
| Samitas, K            | Yes                                                               | Yes                                         | Unclear                                                | No                                            | Yes                                                   | No                                                                                     | No                                                                                                                 | No                                                               | Yes                                          |
| Shkeiri, R            | Unclear                                                           | Yes                                         | Unclear                                                | Unclear                                       | Unclear                                               | Unclear                                                                                | No                                                                                                                 | No                                                               | Yes                                          |
| Troy, L               | Yes                                                               | Yes                                         | Yes                                                    | Yes                                           | No                                                    | No                                                                                     | No                                                                                                                 | Yes                                                              | No                                           |
| Turan, D              | Unclear                                                           | Yes                                         | Unclear                                                | No                                            | Yes                                                   | Yes                                                                                    | No                                                                                                                 | No                                                               | Yes                                          |
| Ussavaringsi, K       | Unclear                                                           | Yes                                         | Unclear                                                | No                                            | Yes                                                   | Unclear                                                                                | Unclear                                                                                                            | No                                                               | Yes                                          |
| Walsher, J            | Yes                                                               | Yes                                         | Yes                                                    | No                                            | Yes                                                   | Yes                                                                                    | No                                                                                                                 | No                                                               | Yes                                          |
| Zaizen, Y             | Unclear                                                           | Yes                                         | Yes                                                    | No                                            | Yes                                                   | No                                                                                     | No                                                                                                                 | Unclear                                                          | Unclear                                      |

**Table 2:** Diagnostic yield, (change in) diagnostic confidence, and adverse events in studies evaluating SLB or second TBLC in patients with ILD and a non-informative initial TBLC

| First author<br>Year<br>Country   | Test performed after an inconclusive initial TBLC:<br>-2nd TBLC<br>-SLB | Number of patients:<br>Undergoing initial TBLC (number with diagnostic TBLC / number with inconclusive or non-diagnostic TBLC)                                                      | Number of patients:<br>No subsequent test (SLB or 2nd TBLC) performed and reason | Number of patients:<br>Subsequent test (SLB or 2nd TBLC) performed after inconclusive initial TBLC | Number of patients:<br>Specific histopathological diagnosis obtained by subsequent test (SLB or 2nd TBLC)                           | Number of patients:<br>Change in confidence or histopathological diagnosis after subsequent test (SLB or 2nd TBLC)       | Diagnostic yield<br>Proportion of diagnostic subsequent tests (SLB or 2nd TBLC) | Other outcomes<br>Complications and other outcomes (e.g. costs) of subsequent tests (SLB or 2nd TBLC) |
|-----------------------------------|-------------------------------------------------------------------------|-------------------------------------------------------------------------------------------------------------------------------------------------------------------------------------|----------------------------------------------------------------------------------|----------------------------------------------------------------------------------------------------|-------------------------------------------------------------------------------------------------------------------------------------|--------------------------------------------------------------------------------------------------------------------------|---------------------------------------------------------------------------------|-------------------------------------------------------------------------------------------------------|
| Babiak, A<br>2009<br>Germany      | SLB                                                                     | 41 (39/2)<br>-n=39: definitive diagnosis based on history, noninvasive testing and TBLC/TBLB<br>-n=2: non-diagnostic                                                                | 0                                                                                | 2                                                                                                  | 2<br>-n=1: NSIP<br>-n=1: IPF                                                                                                        | NR/NA                                                                                                                    | SLB:<br>100% (2/2)                                                              | Complications SLB:<br>-NR                                                                             |
| Bango-Álvarez, A<br>2017<br>Spain | SLB                                                                     | 106 (91/15)<br>-n=91: definitive diagnosis after consensus of the MDD (informed by TBLC results)<br>-n=15: inconclusive                                                             | 12<br>-n=12: SLB contra-indicated                                                | 3                                                                                                  | 3<br>-n=1: mild interstitial fibrosis<br>-n=1: unclassifiable interstitial pneumonia<br>-n=1: DIP                                   | NR/NA                                                                                                                    | SLB:<br>100% (3/3)                                                              | Complications SLB:<br>-n=1: prolonged air leak                                                        |
| Bondue, B<br>2020<br>Belgium      | SLB                                                                     | 81 (68/13)<br>-n=52: specific histological pattern other than NSIP<br>-n=16: NSIP<br>-n=13: no definite histological diagnosis                                                      | 5<br>-n=4: SLB refused<br>-n=1: diagnoses as chronic HP in MDD                   | 8                                                                                                  | 8<br>-n=2: HP<br>-n=6: UIP                                                                                                          | NR/NA                                                                                                                    | SLB:<br>100% (8/8)                                                              | Complications SLB:<br>-NR                                                                             |
| Cascante, J<br>2016<br>Spain      | SLB                                                                     | 55 (48/7)<br>-n=38: certain diagnosis<br>-n=10: highly likely diagnosis<br>-n=7: undiagnosed                                                                                        | 6<br>-n=5: SLB contra-indicated<br>-n=1: diagnosis obtained through BAL          | 1                                                                                                  | 1<br>-n=1: UIP                                                                                                                      | NR/NA                                                                                                                    | SLB:<br>100% (1/1)                                                              | Complications SLB:<br>-NR                                                                             |
| Cho, R<br>2019<br>USA             | SLB                                                                     | 40 (34/6)<br>-n=34: diagnostic specimens<br>-n=6: non-diagnostic specimens                                                                                                          | 4<br>-n=4: NR                                                                    | 2                                                                                                  | 2<br>-n=1: RB-ILD<br>-n=1: NSIP                                                                                                     | NR/NA                                                                                                                    | SLB:<br>100% (2/2)                                                              | Complications SLB:<br>-NR                                                                             |
| Fruchter, O<br>2014<br>Israel     | SLB                                                                     | 75 (73/2)<br>-n=52: definite clinicopathological consensus diagnosis<br>-n=21: probable clinicopathological diagnosis<br>-n=2: normal lung tissue                                   | 1<br>-n=1: SLB refused                                                           | 1                                                                                                  | 1<br>-n=1: UIP/IPF                                                                                                                  | NR/NA                                                                                                                    | SLB:<br>100% (1/1)                                                              | Complications SLB:<br>-NR                                                                             |
| Hagmeyer, L<br>2016<br>Germany    | SLB                                                                     | 32 (23/9)<br>-n=23: TBLC showed strong congruence with initially suspected diagnosis<br>-n=6: TBLC showed only approximate congruence<br>-n=3: TBLC described an unspecific pattern | 1<br>-n=1: NR                                                                    | 8                                                                                                  | 6:<br>-n=4: definite UIP<br>-n=1: OP<br>-n=1: sarcoidosis<br><br>Non-diagnostic cases:<br>-n=1: possible UIP<br>-n=1: possible NSIP | -n=7: MDD informed by SLB resulted in definitive diagnosis<br>-n=1: MDD informed by SLB resulted in a probable diagnosis | SLB:<br>75% (6/8)                                                               | Complications SLB:<br>-n=2: died within 30 days after SLB due to acute exacerbation of lung fibrosis  |
| Hagmeyer, L<br>2019<br>Germany    | SLB                                                                     | 61 (46/15)<br>-n=46: MDD consensus<br>-n=15: SLB recommended                                                                                                                        | 2<br>-n=2: SLB refused                                                           | 13                                                                                                 | 12<br>-n=12: conclusive clinical diagnosis could be achieved after SLB                                                              | -n=3: SLB led to MDD consensus with change of the recorded                                                               | SLB:<br>92% (12/13)                                                             | Complications SLB:<br>-n=1: an overnight stay at ICU due to prolonged respiratory and                 |

|                                               |                 |                                                                                                                                                                                                           |                                                                                     |                                                                                                                                                                                           |                                                                                                                                                    |                                                                                                                                                                                          |                                                   |                            |
|-----------------------------------------------|-----------------|-----------------------------------------------------------------------------------------------------------------------------------------------------------------------------------------------------------|-------------------------------------------------------------------------------------|-------------------------------------------------------------------------------------------------------------------------------------------------------------------------------------------|----------------------------------------------------------------------------------------------------------------------------------------------------|------------------------------------------------------------------------------------------------------------------------------------------------------------------------------------------|---------------------------------------------------|----------------------------|
|                                               |                 |                                                                                                                                                                                                           |                                                                                     |                                                                                                                                                                                           |                                                                                                                                                    | histopathological pattern<br>-n=5: SLB led to MDD consensus with an improved confidence<br>-n=4: MDD consensus but no change of pattern or improved confidence<br>-n=1: no MDD consensus |                                                   | cardiovascular instability |
| <b>Hernandez-Gonzalez, F</b><br>2015<br>Spain | SLB             | 33 (26/7)<br>-n=26: specific diagnosis obtained<br>-n=5: non-diagnostic sample<br>-n=2: invalid sample                                                                                                    | 6<br>-n=3: SLB contra-indicated<br>-n=3: diagnosed as ILD of unknown origin         | 1                                                                                                                                                                                         | 1<br>-n=1: peribronchiolar metaplasia                                                                                                              | NR/NA                                                                                                                                                                                    | SLB:<br>100% (1/1)                                | Complications SLB:<br>-NR  |
| <b>Hetzel, J</b><br>2020<br>Germany           | SLB             | 128<br>-n=69: confident diagnosis<br>-n=35: provisional diagnosis with high confidence<br>-n=18: provisional diagnosis with low confidence/<br>unclassifiable ILD<br>-n=6: no consensus after CR+BAL+TBLC | NR                                                                                  | 3<br><i>An additional 6 patients also underwent SLB (based on MDD decision) despite a confident diagnosis or provisional diagnosis with high confidence; these were not included here</i> | 1<br>-n=1: DIP                                                                                                                                     | -n=1: no consensus changed to confident diagnosis                                                                                                                                        | SLB:<br>33% (1/3)                                 | Complications SLB:<br>-NR  |
| <b>Koslow, M</b><br>2020<br>USA               | SLB             | 120 (75/45)<br>-n=66: diagnostic<br>-n=9: non-diagnostic but clinically useful<br>-n=45: non-diagnostic                                                                                                   | 35<br>-n=35: NR                                                                     | 10                                                                                                                                                                                        | 8<br>-n=2: UIP/IPF<br>-n=3: chronic HP<br>-n=1: cryptogenic constrictive bronchiolitis<br>-n=1: DIP<br>-n=1: PVOD                                  | NR/NA                                                                                                                                                                                    | SLB<br>80% (8/10)                                 | Complications SLB:<br>-NR  |
| <b>Kronborg-White, S</b><br>2021<br>Denmark   | SLB<br>2nd TBLC | 250 (180/70)<br>-n=180: specific pattern<br>-n=70: no diagnosis after MDD                                                                                                                                 | 46<br>-n=46: consensus diagnosis of unclassifiable ILD                              | 24<br>-n=16: SLB<br>-n=8: 2nd TBLC                                                                                                                                                        | 19<br>SLB:<br>-n=11: UIP<br>-n=1: fibrotic HP<br>-n=1: RB-ILD<br>-n=1: asbestosis<br><br>2nd TBLC:<br>-n=3: UIP<br>-n=1: fibrotic HP<br>-n=1: COPD | NR/NA                                                                                                                                                                                    | SLB:<br>88% (14/16)<br><br>2nd TBLC:<br>63% (5/8) | Complications SLB:<br>-NR  |
| <b>Kropski, J</b><br>2013<br>USA              | SLB             | 25 (19/6)<br>-n=19: specific clinical-pathologic diagnosis<br>-n=6: non-diagnostic                                                                                                                        | 3<br>-n=1: normal tissue at TBLC considered sufficient to rule out DPLD<br>-n=2: NR | 3                                                                                                                                                                                         | 2<br>-n=1: UIP<br>-n=1: COP                                                                                                                        | NR/NA                                                                                                                                                                                    | SLB:<br>67% (2/3)                                 | Complications SLB:<br>-NR  |
| <b>Lentz, R</b><br>2018<br>USA                | SLB             | 104 (71/33)<br>-n=46: confident histopathological diagnosis based on TBLC                                                                                                                                 | 28<br>-n=28: NR ("offered but declined" in several cases)                           | 5                                                                                                                                                                                         | 3<br>-n=1: UIP/IPF<br>-n=1: T-cell lymphoma<br>-n=1: OP                                                                                            | -n=1: SLB confirmed the suspected histological results obtained from TBLC                                                                                                                | SLB:<br>60% (3/5)                                 | Complications SLB:<br>-NR  |

|                                      |                 |                                                                                                                              |                                                                                                                                                                                              |                                     |                                                                                                                                                                                                                                                                                                                                                                                 |                                                                                       |                                                     |                           |
|--------------------------------------|-----------------|------------------------------------------------------------------------------------------------------------------------------|----------------------------------------------------------------------------------------------------------------------------------------------------------------------------------------------|-------------------------------------|---------------------------------------------------------------------------------------------------------------------------------------------------------------------------------------------------------------------------------------------------------------------------------------------------------------------------------------------------------------------------------|---------------------------------------------------------------------------------------|-----------------------------------------------------|---------------------------|
|                                      |                 | -n=25: less-than-definite histopathological diagnosis based on TBLC, but confident consensus at MDD<br>-n=33: non-diagnostic |                                                                                                                                                                                              |                                     |                                                                                                                                                                                                                                                                                                                                                                                 | -n=2: SLB showed a different histological pattern than TBLC and a change in diagnosis |                                                     |                           |
| <b>Marcoa, R</b><br>2017<br>Portugal | SLB             | 90 (62/28)<br>-n=62: definite diagnosis at MDD informed by TBLC<br>-n=2: lost to follow-up<br>-n=26: no definite diagnosis   | 20<br>-n=1: SLB refused<br>-n=5: SLB contra-indicated<br>-n=11: working diagnosis based on clinical and radiological evaluation and MDD<br>-n=3: remain under investigation                  | 6                                   | 6<br>-n=1: HP<br>-n=2: secondary UIP<br>-n=1: IPF<br>-n=1: NSIP<br>-n=1: silicosis                                                                                                                                                                                                                                                                                              | NR/NA                                                                                 | SLB:<br>100% (6/6)                                  | Complications SLB:<br>-NR |
| <b>O'Mahony</b><br>2021<br>Ireland   | SLB             | 100 (72/28)<br>-n=72: histological diagnosis<br>-n=3: inadequate<br>-n=25: non-diagnostic                                    | 25<br>-n=19: clinical-radiological diagnosis<br>-n=5: unclassifiable ILD<br>-n=1: contra-indicated                                                                                           | 3                                   | 1<br>-n=1: eosinophilic pneumonia                                                                                                                                                                                                                                                                                                                                               | NR/NA                                                                                 | SLB:<br>33% (1/3)                                   | Complications SLB:<br>-NR |
| <b>Ramaswamy, A</b><br>2016<br>USA   | SLB             | 56 (37/19)<br>-n=37: definitive pathologic diagnosis<br>-n=19: no definite diagnosis                                         | 17<br>-n=4: definitive pathologic diagnosis made by TBLB<br>-n=6: infectious diagnosis by bronchoscopy<br>-n=4: non-specific inflammation<br>-n=2: clinical diagnosis established<br>n=1: NR | 2                                   | 2<br>-n=1: UIP<br>-n=1: GVHD                                                                                                                                                                                                                                                                                                                                                    | NR/NA                                                                                 | SLB:<br>100% (2/2)                                  | Complications SLB:<br>-NR |
| <b>Ravaglia, C</b><br>2019<br>Italy  | SLB<br>2nd TBLC | 699 (614/85)<br>-n=614: Specific histological pattern<br>-n=85: non-diagnostic or uncertain                                  | 43<br>-n=16: diagnosis reached in MDD<br>-n=20: unclassifiable ILD<br>-n=6: subsequent CT-guided lung biopsy performed<br>-n=1: subsequent mediastinoscopy performed                         | 42<br>-n=38: SLB<br>-n= 4: 2nd TBLC | 42<br>SLB:<br>-n=1: OP<br>-n=16: IPF<br>-n=1: vasculitis<br>-n=1 cocaine-lung<br>-n=3 chronic HP<br>-n=1: ACFE<br>-n=1: ECD<br>-n=4: lung cancer<br>-n=3: iNSIP<br>-n=2: RB-ILD<br>-n=1: lymphoma<br>-n=1: PLCH<br>-n=1: alveolar proteinosis<br>-n=1: CTD-ILD<br>-n=1: diffuse inflammatory myofibroblastic tumour<br><br>2nd TBLC:<br>-n=1: alveolar proteinosis<br>-n=1: IPF | NR/NA                                                                                 | SLB:<br>100% (38/38)<br><br>2nd TBLC:<br>100% (4/4) | Complications SLB:<br>-NR |

|                                       |     |                                                                                                                                                                                                                    |                                                                                                                                                 |                                                        |                                                                                                                                                                              |                                                                                                                                                                          |                     |                                          |
|---------------------------------------|-----|--------------------------------------------------------------------------------------------------------------------------------------------------------------------------------------------------------------------|-------------------------------------------------------------------------------------------------------------------------------------------------|--------------------------------------------------------|------------------------------------------------------------------------------------------------------------------------------------------------------------------------------|--------------------------------------------------------------------------------------------------------------------------------------------------------------------------|---------------------|------------------------------------------|
|                                       |     |                                                                                                                                                                                                                    |                                                                                                                                                 |                                                        | -n=1: lymphoma<br>-n=1: ACFE                                                                                                                                                 |                                                                                                                                                                          |                     |                                          |
| <b>Romagnoli, M</b><br>2019<br>Italy  | SLB | 21<br>(17/4)<br>-n=17: histologic diagnosis<br>-n=4: non-diagnostic                                                                                                                                                | 0                                                                                                                                               | 4<br>(all patients in the study had both TBLC and SLB) | 4<br>-n=1: PLCH<br>-n=2: UIP<br>-n=1: ALI                                                                                                                                    | NR/NA                                                                                                                                                                    | SLB:<br>100% (4/4)  | Complications SLB:<br>-NR                |
| <b>Samitas, K</b><br>2019<br>Greece   | SLB | 50<br>(40/10)<br>-n=40: histologic diagnosis (but TBLC contributed to MDD final diagnosis in n=38)<br>-n=10: no histologic diagnosis                                                                               | 8<br>-n=5: SLB not suggested (reason unclear)<br>-n=3: SLB refused                                                                              | 2                                                      | 2<br>-n=1: B-cell low grade lymphoma<br>-n=1: fNSIP                                                                                                                          | NR/NA                                                                                                                                                                    | SLB:<br>100% (2/2)  | Complications SLB:<br>-NR                |
| <b>Shkeiri, R</b><br>2020<br>Israel   | SLB | 97<br>(52/45)<br>-n=52: histopathologic diagnosis<br>-n=45: nonspecific histologic findings                                                                                                                        | 42<br>-n=NR                                                                                                                                     | 3                                                      | 3<br>-n=1: UIP<br>-n=1: DAD<br>-n=1: extranodal marginal cell lymphoma                                                                                                       | NR/NA                                                                                                                                                                    | SLB:<br>100% (3/3)  | Complications SLB:<br>-NR                |
| <b>Troy, L</b><br>2020<br>Australia   | SLB | 65<br>(6/59)<br>-n=59: diagnostic<br>-n=3: unclassifiable<br>-n=3: non-diagnostic<br><br><i>For MDD:</i><br>-n=39: high confidence or definite final MDD diagnoses<br>-n=26: unclassifiable or low-confidence TBLC | 0                                                                                                                                               | 6<br>(all patients in the study had both TBLC and SLB) | 5<br>-n=2: UIP-IPF<br>-n=1: HP<br>-n=1: DIP/RB-ILD<br>-n=1: NSIP                                                                                                             | -n=6: in the n=26 with unclassifiable or low-confidence diagnosis at MDD+TBLC, n=6 (23%) were reclassified into alternative high confidence or definite diagnoses by SLB | SLB:<br>83% (5/6)   | Complications SLB:<br>-NR                |
| <b>Turan, D</b><br>2021<br>Turkey     | SLB | 147 (98/49)<br>-n=98: histopathological diagnosis<br>-n=49: non-diagnostic                                                                                                                                         | 23<br>-n=11: MDD diagnosis<br>-n=12: SLB refused or contra-indicated                                                                            | 26                                                     | 21<br>-n=11: UIP<br>-n=5: HP<br>-n=2: adenocarcinoma<br>-n=1: NSIP<br>-n=1: emphysema<br>-n=1: anthracosis                                                                   | NR/NA                                                                                                                                                                    | SLB:<br>81% (21/26) | Complications SLB:<br>-NR                |
| <b>Ussavarungsi, K</b><br>2017<br>USA | SLB | 74<br>(38/36)<br>-n=38: definite MDD diagnosis<br>-n=36: non-diagnostic (n=31 with non-diagnostic biopsy results; n=5 with discrepancies between histopathologic diagnosis and MDD)                                | 29<br>-n=8: SLB refused<br>-n=21: possible diagnosis reached in MDD (despite a non-diagnostic TBLC)                                             | 7                                                      | 7<br>-n=1: lymphomatoid granulomatosis<br>-n=1: ANCA-associated vasculitis<br>-n=2: UIP<br>-n=1: HP<br>-n=1: HP/UIP<br>-n=1: granulomatous inflammation associated with CVID | -n=7: in all patients undergoing subsequent SLB, this resulted in a final diagnosis at MDD                                                                               | SLB:<br>100% (7/7)  | Complications SLB:<br>-NR                |
| <b>Walscher, J</b><br>2018<br>Germany | SLB | 109<br>(80/29)<br>-n=80: histological diagnosis<br>-n=29: non-specific disease pattern                                                                                                                             | 21<br>-n=2: SLB refused<br>-n=3: SLB contra-indicated<br>-n=5: no SLB proposed by MDD (watch-and-wait strategy)<br>-n=11: MDD diagnosis reached | 8                                                      | 8<br>-n=3: HP<br>-n=2: IPF<br>-n=1: iNSIP<br>-n=1: IgG4 associated-ILD<br>-n=1: sarcoidosis                                                                                  | NR/NA                                                                                                                                                                    | SLB:<br>100% (8/8)  | Complications SLB:<br>-NR                |
| <b>Zaizen, Y</b><br>2019              | SLB | 35<br>(NR/7)                                                                                                                                                                                                       | NR                                                                                                                                              | 7                                                      | 7<br>-n=4: UIP                                                                                                                                                               | -n=7: in all patients undergoing                                                                                                                                         | SLB:<br>100% (7/7)  | Complications SLB:<br>-No adverse events |

|       |  |                      |  |  |                                               |                                                                                                                                                                                                                                                                    |  |  |
|-------|--|----------------------|--|--|-----------------------------------------------|--------------------------------------------------------------------------------------------------------------------------------------------------------------------------------------------------------------------------------------------------------------------|--|--|
| Japan |  | -n=7: non-diagnostic |  |  | -n=1: ACIF<br>-n=1: DPO<br>-n=1: NSIP with OP | subsequent SLB, this resulted in a final diagnosis at MDD<br><br>-Pathological diagnosis with TBLC and SLB had agreement in 5 cases, and the diagnosis was changed from indeterminate for UIP pattern with TBLC to probable UIP with SLB in the remaining 2 cases. |  |  |
|-------|--|----------------------|--|--|-----------------------------------------------|--------------------------------------------------------------------------------------------------------------------------------------------------------------------------------------------------------------------------------------------------------------------|--|--|

#### Legend:

Abbreviations: ACFE = airway-centered fibroelastosis. ACIF = airway centered interstitial fibrosis. ALI = acute lung injury. ANCA = antineutrophil cytoplasmic antibodies. BAL = bronchoalveolar lavage. CI = confidence interval. COP = cryptogenic organizing pneumonia. COPD = chronic obstructive pulmonary disease. CR = clinicoradiological data. CTD = connective tissue disease. CVID = common variable immunodeficiency disorder. DAD = diffuse alveolar damage. DIP = desquamative interstitial pneumonia. DPLD: diffuse parenchymal lung disease. ECD = Erdheim Chester disease. GVHD = graft versus host disease. HP = hypersensitivity pneumonitis. ICU = intensive care unit. ILD = interstitial lung disease. iNSIP = idiopathic non-specific interstitial pneumonia. IPF = idiopathic pulmonary fibrosis. fNSIP = fibrotic non-specific interstitial pneumonia. MDD = multidisciplinary discussion. NA = not applicable. NR = not reported. NSIP = non-specific interstitial pneumonia. OP = organizing pneumonia. PLCH = pulmonary Langerhans cell histiocytosis. PVOD = pulmonary veno-occlusive disease. RB-ILD = respiratory bronchiolitis interstitial lung disease. SLB = surgical lung biopsy. TBLB = transbronchial lung biopsys. TBLC = transbronchial lung cryobiopsy. UIP = usual interstitial pneumonia. VATS = video-assistend thoracic surgery.

**Figure 1a:** Meta-analysis of diagnostic yield of SLB in ILD patients with an non-informative initial TBLC

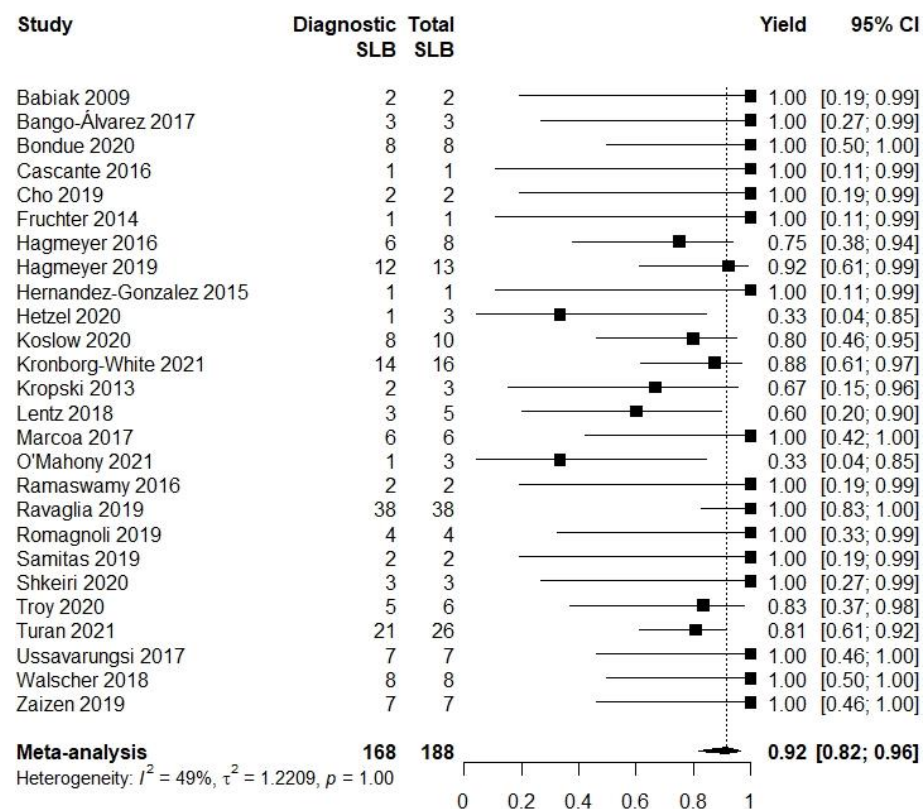

**Figure 1b:** Meta-analysis of diagnostic yield of SLB in ILD patients with an non-informative initial TBLC, excluding studies contributing <10 patients

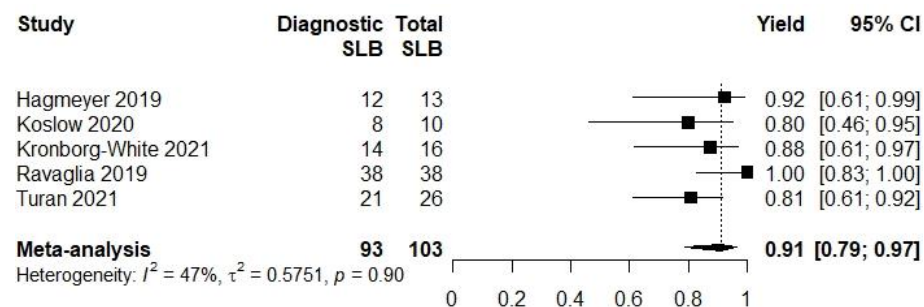



**Table 3:** GRADE tables for PICO question 3

*PICO question:*

In patients with undiagnosed ILD and a non-informative TBLC, is step-up SLB or second TBLC a valid add-on test?

| Certainty assessment                                                |                       |                      |               |                      |                      |                      | Impact                                                                                                                                                                                                                                                                                                                                                                                                                                                                                                                                                                                                                                                                                                                                                                     | Certainty        | Importance |
|---------------------------------------------------------------------|-----------------------|----------------------|---------------|----------------------|----------------------|----------------------|----------------------------------------------------------------------------------------------------------------------------------------------------------------------------------------------------------------------------------------------------------------------------------------------------------------------------------------------------------------------------------------------------------------------------------------------------------------------------------------------------------------------------------------------------------------------------------------------------------------------------------------------------------------------------------------------------------------------------------------------------------------------------|------------------|------------|
| No of studies                                                       | Study design          | Risk of bias         | Inconsistency | Indirectness         | Imprecision          | Other considerations |                                                                                                                                                                                                                                                                                                                                                                                                                                                                                                                                                                                                                                                                                                                                                                            |                  |            |
| Diagnostic yield step-up SLB (after inconclusive initial TBLC)      |                       |                      |               |                      |                      |                      |                                                                                                                                                                                                                                                                                                                                                                                                                                                                                                                                                                                                                                                                                                                                                                            |                  |            |
| 26 <sup>1,26</sup>                                                  | observational studies | serious <sup>a</sup> | not serious   | serious <sup>b</sup> | not serious          | none                 | Summary diagnostic yield in meta-analysis:0.92 (0.82 to 0.96)                                                                                                                                                                                                                                                                                                                                                                                                                                                                                                                                                                                                                                                                                                              | ⊕○○○<br>Very low | CRITICAL   |
| Diagnostic confidence step-up SLB (after inconclusive initial TBLC) |                       |                      |               |                      |                      |                      |                                                                                                                                                                                                                                                                                                                                                                                                                                                                                                                                                                                                                                                                                                                                                                            |                  |            |
| 2 <sup>3,7</sup>                                                    | observational studies | serious <sup>c</sup> | not serious   | not serious          | serious <sup>d</sup> | none                 | Hagmeyer et al: In 15 patients, step-up SLB was recommended because a confident MDD-diagnosis was not reached after TBLC, which was performed in 13. A conclusive clinical diagnosis was made in 92% (n=12) of them (change in histopathological diagnosis (n=3), improved MDD confidence (n=5), no additional information (n=4)).<br><br>Bondue et al: In 29 patients, step-up SLB was recommended because of an uncertain histopathological diagnosis (n=13) or a NSIP pattern (n=16), which was performed in 14. This showed UIP pattern in 79% (n=11), HP pattern in 14% (n=2), and NSIP pattern in 7% (n=1). Of the six patients with an NSIP pattern at TBLC undergoing subsequent SLB, this showed a UIP pattern in five, and confirmed a NSIP pattern in only one. | ⊕○○○<br>Very low | CRITICAL   |
| Complications step-up SLB (after inconclusive initial TBLC)         |                       |                      |               |                      |                      |                      |                                                                                                                                                                                                                                                                                                                                                                                                                                                                                                                                                                                                                                                                                                                                                                            |                  |            |
| 4 <sup>2,7,8,26</sup>                                               | observational studies | serious <sup>a</sup> | not serious   | not serious          | serious <sup>f</sup> | none                 | Complications reported for SLB in 4/31 patients for whom this information was reported: prolonged airleak (n=1); death within 30 days after SLB due to acute exacerbation of lung fibrosis (n=2); an overnight stay at ICU due to prolonged respiratory and cardiovascular instability (n=1)                                                                                                                                                                                                                                                                                                                                                                                                                                                                               | ⊕○○○<br>Very low | CRITICAL   |
| Diagnostic yield second TBLC (after inconclusive initial TBLC)      |                       |                      |               |                      |                      |                      |                                                                                                                                                                                                                                                                                                                                                                                                                                                                                                                                                                                                                                                                                                                                                                            |                  |            |
| 2 <sup>12,18</sup>                                                  | observational studies | serious <sup>g</sup> | not serious   | serious <sup>b</sup> | serious <sup>h</sup> | none                 | Diagnostic yield was 100% (4/4 patients) in Ravaglia 2019 and 62.5% (5/8 patients) in Kronborg-White 2021.                                                                                                                                                                                                                                                                                                                                                                                                                                                                                                                                                                                                                                                                 | ⊕○○○<br>Very low | CRITICAL   |

CI: confidence interval

## Explanations

- a. Risk of bias was high in at least one QUADAS-2 domain for 23/26 studies, mainly due related to the patient selection process, as step-up SLB was rarely systematically performed or considered in all consecutive patients with a non-informative TBLC, but only in a poorly defined subset. Applicability concerns were high in 7/20 studies.
- b. Unclear if diagnostic yield sufficiently correspond to the final MDD-diagnosis and to patient-important outcomes.
- c. Risk of bias was high in at least one QUADAS-2 domain in 2/2 studies.
- d. Only 2 studies (including a total of 27 patients undergoing SLB after a non-conclusive initial TBLC) reported on diagnostic confidence. No meta-analysis was performed.
- e. Risk of bias was high in at least one QUADAS-2 domain for 3/4 studies. Applicability concerns were high in 1/4 studies.
- f. Only 4 studies (including a total of 31 patients undergoing SLB after a non-conclusive initial TBLC) reported on complications. No meta-analysis was performed.
- g. Risk of bias was high in at least one QUADAS-2 domain for 2/2 studies. Applicability concerns were high in 0/2 studies.
- h. Only 12 patients (from 2 studies) who underwent a second TBLC after an initial inconclusive TBLC were included for this outcome. No meta-analysis was performed.

## References

1. Babiak A, Hetzel J, Krishna G, et al. Transbronchial cryobiopsy: A new tool for lung biopsies. *Respiration*. 2009;78(2):203-208.
2. Bango-Alvarez A, Ariza-Prota M, Torres-Rivas H, et al. Transbronchial cryobiopsy in interstitial lung disease: experience in 106 cases - how to do it. *ERJ open res*. 2017;3(1).
3. Bonduc B, Leduc D, Froidure A, et al. Usefulness of surgical lung biopsies after cryobiopsies when pathological results are inconclusive or show a pattern suggestive of a nonspecific interstitial pneumonia. *Respiratory Research*. 2020;21(1):231.
4. Cascante JA, Cebollero P, Herrero S, et al. Transbronchial Cryobiopsy in Interstitial Lung Disease: Are We on the Right Path? *J Bronchology Interv Pulmonol*. 2016;23(3):204-209.
5. Cho R, Zamora F, Gibson H, Dincer HE. Transbronchial Lung Cryobiopsy in the Diagnosis of Interstitial Lung Disease: A Retrospective Single-center Experience. *J Bronchology Interv Pulmonol*. 2019;26(1):15-21.
6. Fruchter O, Fridel L, El Raouf BA, Abdel-Rahman N, Rosengarten D, Kramer MR. Histological diagnosis of interstitial lung diseases by cryo-transbronchial biopsy. *Respirology*. 2014;19(5):683-688.
7. Hagmeyer L, Theegarten D, Wohlschlagel J, et al. Transbronchial cryobiopsy in fibrosing interstitial lung disease: modifications of the procedure lead to risk reduction. *Thorax*. 2019;74(7):711-714.
8. Hagmeyer L, Theegarten D, Wohlschlagel J, et al. The role of transbronchial cryobiopsy and surgical lung biopsy in the diagnostic algorithm of interstitial lung disease. *Clin Respir J*. 2016;10(5):589-595.
9. Hernandez-Gonzalez F, Lucena CM, Ramirez J, et al. Cryobiopsy in the diagnosis of diffuse interstitial lung disease: yield and cost-effectiveness analysis. *Archivos de Bronconeumologia*. 2015;51(6):261-267.
10. Hetzel J, Wells AU, Costabel U, et al. Transbronchial cryobiopsy increases diagnostic confidence in interstitial lung disease: a prospective multicentre trial. *European Respiratory Journal*. 2020;56(6):12.
11. Koslow M, Edell ES, Midhun DE, et al. Bronchoscopic Cryobiopsy and Forceps Biopsy for the Diagnostic Evaluation of Diffuse Parenchymal Lung Disease in Clinical Practice. *Mayo Clinic Proceedings Innovations, Quality & Outcomes*. 2020;4(5):565-574.
12. Kronborg-White S, Sritharan SS, Madsen LB, et al. Integration of cryobiopsies for interstitial lung disease diagnosis is a valid and safe diagnostic strategy-experiences based on 250 biopsy procedures. *Journal of Thoracic Disease*. 2021;13(3):1455-1465.
13. Kropski JA, Pritchett JM, Mason WR, et al. Bronchoscopic cryobiopsy for the diagnosis of diffuse parenchymal lung disease. *PLoS ONE*. 2013;8(11):e78674.
14. Lentz RJ, Taylor TM, Kropski JA, et al. Utility of Flexible Bronchoscopic Cryobiopsy for Diagnosis of Diffuse Parenchymal Lung Diseases. *J Bronchology Interv Pulmonol*. 2018;25(2):88-96.
15. Marcoa R, Linhas R, Apolinario D, et al. Diagnostic yield of transbronchial lung cryobiopsy in interstitial lung diseases. *Rev Port Pneumol*. 2017;23(5):296-298.
16. O'Mahony AM, Burke L, Cavazza A, Maher MM, Kennedy MP, Henry MT. Transbronchial lung cryobiopsy (TBLC) in the diagnosis of interstitial lung disease: experience of first 100 cases performed under conscious sedation with flexible bronchoscope. *Irish Journal of Medical Science*. 2021;20:20.
17. Ramaswamy A, Homer R, Killam J, et al. Comparison of Transbronchial and Cryobiopsies in Evaluation of Diffuse Parenchymal Lung Disease. *J Bronchology Interv Pulmonol*. 2016;23(1):14-21.
18. Ravaglia C, Wells AU, Tomassetti S, et al. Diagnostic yield and risk/benefit analysis of trans-bronchial lung cryobiopsy in diffuse parenchymal lung diseases: a large cohort of 699 patients. *BMC pulm*. 2019;19(1):16.

19. Romagnoli M, Colby TV, Berthet JP, et al. Poor Concordance between Sequential Transbronchial Lung Cryobiopsy and Surgical Lung Biopsy in the Diagnosis of Diffuse Interstitial Lung Diseases. *Am J Respir Crit Care Med*. 2019;199(10):1249-1256.
20. Samitas K, Kolilekas L, Vamvakaris I, et al. Introducing transbronchial cryobiopsies in diagnosing diffuse parenchymal lung diseases in Greece: Implementing training into clinical practice. *PLoS ONE*. 2019;14(6):e0217554.
21. Shkeiri R, Schneer S, Avarmovich A, Adir Y. Transbronchial Cryobiopsy in Diffuse Parenchymal Lung Diseases in a Community Medical Center. *Israel Medical Association Journal: Imaj*. 2020;22(12):781-783.
22. Troy LK, Grainge C, Corte TJ, et al. Diagnostic accuracy of transbronchial lung cryobiopsy for interstitial lung disease diagnosis (COLDICE): a prospective, comparative study. *Lancet Respir Med*. 2020;8(2):171-181.
23. Turan D, Ugur Chousein EG, Koc AS, et al. Transbronchial cryobiopsy for diagnosing parenchymal lung diseases: real-life experience from a tertiary referral center. *Sarcoidosis Vasc Diffuse Lung Dis*. 2021;38(1):e2021004.
24. Ussavarungsi K, Kern RM, Roden AC, Ryu JH, Edell ES. Transbronchial Cryobiopsy in Diffuse Parenchymal Lung Disease: Retrospective Analysis of 74 Cases. *Chest*. 2017;151(2):400-408.
25. Wälscher J, Gro B, Eberhardt R, et al. Transbronchial Cryobiopsies for Diagnosing Interstitial Lung Disease: Real-Life Experience from a Tertiary Referral Center for Interstitial Lung Disease. *Respiration*. 2019;97(4):348-354.
26. Zaizen Y, Kohashi Y, Kuroda K, et al. Concordance between sequential transbronchial lung cryobiopsy and surgical lung biopsy in patients with diffuse interstitial lung disease. *Diagn Pathol*. 2019;14(1):131.

**Table 4:** Evidence to decision framework for PICO question 3

*PICO question:*

In patients with undiagnosed ILD and a non-informative TBLC, is step-up SLB or second TBLC a valid add-on test?

| <b>Problem</b><br>Is the problem a priority?                                                                                                                                                                    |                                                                                                                                                                                                                                                                   |                                                                                                                             |
|-----------------------------------------------------------------------------------------------------------------------------------------------------------------------------------------------------------------|-------------------------------------------------------------------------------------------------------------------------------------------------------------------------------------------------------------------------------------------------------------------|-----------------------------------------------------------------------------------------------------------------------------|
| JUDGEMENT                                                                                                                                                                                                       | RESEARCH EVIDENCE                                                                                                                                                                                                                                                 | ADDITIONAL CONSIDERATIONS                                                                                                   |
| <input type="radio"/> No<br><input type="radio"/> Probably no<br><input type="radio"/> Probably yes<br><input checked="" type="radio"/> Yes<br><input type="radio"/> Varies<br><input type="radio"/> Don't know | Diagnostic yield of TBLC in patients with ILD is, on average, 72.9% (based on the systematic review by Sethi 2019). A considerable proportion of patients with a non-diagnostic TBLC remain, and additional diagnostic testing may be required.                   |                                                                                                                             |
| <b>Desirable Effects</b><br>How substantial are the desirable anticipated effects?                                                                                                                              |                                                                                                                                                                                                                                                                   |                                                                                                                             |
| JUDGEMENT                                                                                                                                                                                                       | RESEARCH EVIDENCE                                                                                                                                                                                                                                                 | ADDITIONAL CONSIDERATIONS                                                                                                   |
| <input type="radio"/> Trivial<br><input type="radio"/> Small<br><input checked="" type="radio"/> Moderate<br><input type="radio"/> Large<br><input type="radio"/> Varies<br><input type="radio"/> Don't know    | SLB: Diagnostic yield of SLB in patients with a non-diagnostic TBLC was on average 92% in meta-analysis.<br><br>TBLC: Too little information is available to make statements about the diagnostic yield of a second TBLC.                                         | -SLB: 'moderate' desirable effect.<br><br>-Second TBLC: 'don't know' (there is too little information to make a judgement). |
| <b>Undesirable Effects</b><br>How substantial are the undesirable anticipated effects?                                                                                                                          |                                                                                                                                                                                                                                                                   |                                                                                                                             |
| JUDGEMENT                                                                                                                                                                                                       | RESEARCH EVIDENCE                                                                                                                                                                                                                                                 | ADDITIONAL CONSIDERATIONS                                                                                                   |
| <input type="radio"/> Large<br><input checked="" type="radio"/> Moderate<br><input type="radio"/> Small<br><input type="radio"/> Trivial<br><input type="radio"/> Varies<br><input type="radio"/> Don't know    | SLB: Only a small number of studies included in the meta-analysis on the diagnostic yield of SLB after a non-diagnostic TBLC reported on complications. Complications occurred in 4 out of 31 (12.9%) patients for whom this information was explicitly reported. | -Judgement applies to both SLB and second TBLC.                                                                             |

|                                                                                                                                                                                                                                                                  |                                                                                                                                                                                                                                                                                                       |                                                                                                                                                                                                                                                                                                                                                                                                                                                                                                                                                                                                                                                                                                                                                                                                                                                                                                                    |
|------------------------------------------------------------------------------------------------------------------------------------------------------------------------------------------------------------------------------------------------------------------|-------------------------------------------------------------------------------------------------------------------------------------------------------------------------------------------------------------------------------------------------------------------------------------------------------|--------------------------------------------------------------------------------------------------------------------------------------------------------------------------------------------------------------------------------------------------------------------------------------------------------------------------------------------------------------------------------------------------------------------------------------------------------------------------------------------------------------------------------------------------------------------------------------------------------------------------------------------------------------------------------------------------------------------------------------------------------------------------------------------------------------------------------------------------------------------------------------------------------------------|
|                                                                                                                                                                                                                                                                  | TBLC: Complication rates are not available for second TBLC in these patients. However, despite this limited evidence, it is likely that the overall complication rates of SLB and TBLC in ILD patients (PICO question 1) can be extrapolated to patients with an initial non-diagnostic initial TBLC. |                                                                                                                                                                                                                                                                                                                                                                                                                                                                                                                                                                                                                                                                                                                                                                                                                                                                                                                    |
| <b>Certainty of evidence</b><br>What is the overall certainty of the evidence of effects?                                                                                                                                                                        |                                                                                                                                                                                                                                                                                                       |                                                                                                                                                                                                                                                                                                                                                                                                                                                                                                                                                                                                                                                                                                                                                                                                                                                                                                                    |
| <b>JUDGEMENT</b>                                                                                                                                                                                                                                                 | <b>RESEARCH EVIDENCE</b>                                                                                                                                                                                                                                                                              | <b>ADDITIONAL CONSIDERATIONS</b>                                                                                                                                                                                                                                                                                                                                                                                                                                                                                                                                                                                                                                                                                                                                                                                                                                                                                   |
| <ul style="list-style-type: none"> <li>● Very low</li> <li>○ Low</li> <li>○ Moderate</li> <li>○ High</li> <li>○ No included studies</li> </ul>                                                                                                                   | Overall certainty of the evidence was 'very low'.                                                                                                                                                                                                                                                     | -Judgement applies to both SLB and second TBLC.                                                                                                                                                                                                                                                                                                                                                                                                                                                                                                                                                                                                                                                                                                                                                                                                                                                                    |
| <b>Values</b><br>Is there important uncertainty about or variability in how much people value the main outcomes?                                                                                                                                                 |                                                                                                                                                                                                                                                                                                       |                                                                                                                                                                                                                                                                                                                                                                                                                                                                                                                                                                                                                                                                                                                                                                                                                                                                                                                    |
| <b>JUDGEMENT</b>                                                                                                                                                                                                                                                 | <b>RESEARCH EVIDENCE</b>                                                                                                                                                                                                                                                                              | <b>ADDITIONAL CONSIDERATIONS</b>                                                                                                                                                                                                                                                                                                                                                                                                                                                                                                                                                                                                                                                                                                                                                                                                                                                                                   |
| <ul style="list-style-type: none"> <li>○ Important uncertainty or variability</li> <li>○ Possibly important uncertainty or variability</li> <li>● Probably no important uncertainty or variability</li> <li>○ No important uncertainty or variability</li> </ul> |                                                                                                                                                                                                                                                                                                       | <p>-It is unlikely that there is considerable variability in how much the main outcomes are valued, both for physicians and patients. However, some may put more value to establishing a diagnosis, while others may put more value to safety (i.e. preventing adverse events from additional invasive testing).</p> <p>-SLB: 'probably no important uncertainty or variability'.</p> <p>-Second TBLC: 'possibly important uncertainty or variability' (due to limited evidence).</p> <p>-Summary of patient feedback (one patient who underwent TBLC, one who underwent SLB): "The evidence indicates that SLB is more likely to give an accurate answer than TBLC but is associated with higher risks. Given the data on the scale of these benefits and risks, we consider that most patients would opt for a TBLC but, if that does not work, would then prefer to have a SLB, rather than a second TBLC."</p> |

## Balance of effects

Does the balance between desirable and undesirable effects favor the intervention or the comparison?

| JUDGEMENT                                                                                                                                                                                                                                                                                                      | RESEARCH EVIDENCE | ADDITIONAL CONSIDERATIONS                                                                                                                                                                                                                                                                                                                                                                                                                                                                                                                                                                                                                                                                                                                                                                                                           |
|----------------------------------------------------------------------------------------------------------------------------------------------------------------------------------------------------------------------------------------------------------------------------------------------------------------|-------------------|-------------------------------------------------------------------------------------------------------------------------------------------------------------------------------------------------------------------------------------------------------------------------------------------------------------------------------------------------------------------------------------------------------------------------------------------------------------------------------------------------------------------------------------------------------------------------------------------------------------------------------------------------------------------------------------------------------------------------------------------------------------------------------------------------------------------------------------|
| <ul style="list-style-type: none"> <li>○ Favors the comparison</li> <li>○ Probably favors the comparison</li> <li>○ Does not favor either the intervention or the comparison</li> <li>● Probably favors the intervention</li> <li>○ Favors the intervention</li> <li>○ Varies</li> <li>○ Don't know</li> </ul> |                   | <p>-Performing SLB after a non-diagnostic initial TBLC will improve diagnostic yield of the diagnostic process. Whether this is also the case for a second TBLC is unknown due to limited evidence; diagnostic yield is likely to be lower than for SLB. SLB (and second TBLC) are associated with additional adverse events and costs. In general, we believe that these disadvantages are outweighed by the need to obtain a diagnosis. These are all patients that had an indication to undergo TBLC for diagnosing ILD. Because initial TBLC was non-diagnostic, the indication to undergo invasive diagnostic testing remains. Therefore, the balance is probably in favor of performing an additional test.</p> <p>-SLB: 'probably favors the intervention'.</p> <p>-Second TBLC: 'don't know' (due to limited evidence).</p> |

## Resources required

How large are the resource requirements (costs)?

| JUDGEMENT                                                                                                                                                                                                                      | RESEARCH EVIDENCE                                                                                                                                          | ADDITIONAL CONSIDERATIONS                                                                                                                                                                                                                                                                                         |
|--------------------------------------------------------------------------------------------------------------------------------------------------------------------------------------------------------------------------------|------------------------------------------------------------------------------------------------------------------------------------------------------------|-------------------------------------------------------------------------------------------------------------------------------------------------------------------------------------------------------------------------------------------------------------------------------------------------------------------|
| <ul style="list-style-type: none"> <li>○ Large costs</li> <li>○ Moderate costs</li> <li>○ Negligible costs and savings</li> <li>○ Moderate savings</li> <li>○ Large savings</li> <li>○ Varies</li> <li>● Don't know</li> </ul> | Our PICO questions did not focus on cost-effectiveness, and such studies are not available in the subgroup of patients with a non-diagnostic initial TBLC. | A second invasive test (i.e. SLB or second TBLC) after a non-diagnostic initial TBLC will lead to additional costs. However, establishing a correct diagnosis may result in cost-reduction (e.g. by preventing incorrect treatment). Evidence to weigh these costs is not available in this subgroup of patients. |

## Certainty of evidence of required resources

What is the certainty of the evidence of resource requirements (costs)?

| JUDGEMENT                                                                                       | RESEARCH EVIDENCE | ADDITIONAL CONSIDERATIONS |
|-------------------------------------------------------------------------------------------------|-------------------|---------------------------|
| <ul style="list-style-type: none"> <li>○ Very low</li> <li>○ Low</li> <li>○ Moderate</li> </ul> |                   |                           |

|                                                                                                                                                                                                                                                                                                                         |                                                                                                                                                                                                                                             |                                                                                                                                                                                                                                                          |
|-------------------------------------------------------------------------------------------------------------------------------------------------------------------------------------------------------------------------------------------------------------------------------------------------------------------------|---------------------------------------------------------------------------------------------------------------------------------------------------------------------------------------------------------------------------------------------|----------------------------------------------------------------------------------------------------------------------------------------------------------------------------------------------------------------------------------------------------------|
| <ul style="list-style-type: none"> <li>○ High</li> <li>● No included studies</li> </ul>                                                                                                                                                                                                                                 |                                                                                                                                                                                                                                             |                                                                                                                                                                                                                                                          |
| <b>Cost effectiveness</b><br>Does the cost-effectiveness of the intervention favor the intervention or the comparison?                                                                                                                                                                                                  |                                                                                                                                                                                                                                             |                                                                                                                                                                                                                                                          |
| <b>JUDGEMENT</b>                                                                                                                                                                                                                                                                                                        | <b>RESEARCH EVIDENCE</b>                                                                                                                                                                                                                    | <b>ADDITIONAL CONSIDERATIONS</b>                                                                                                                                                                                                                         |
| <ul style="list-style-type: none"> <li>○ Favors the comparison</li> <li>○ Probably favors the comparison</li> <li>○ Does not favor either the intervention or the comparison</li> <li>○ Probably favors the intervention</li> <li>○ Favors the intervention</li> <li>○ Varies</li> <li>● No included studies</li> </ul> | Our PICO questions did not focus on cost-effectiveness, and such studies are not available in the subgroup of patients with a non-diagnostic initial TBLC.                                                                                  |                                                                                                                                                                                                                                                          |
| <b>Equity</b><br>What would be the impact on health equity?                                                                                                                                                                                                                                                             |                                                                                                                                                                                                                                             |                                                                                                                                                                                                                                                          |
| <b>JUDGEMENT</b>                                                                                                                                                                                                                                                                                                        | <b>RESEARCH EVIDENCE</b>                                                                                                                                                                                                                    | <b>ADDITIONAL CONSIDERATIONS</b>                                                                                                                                                                                                                         |
| <ul style="list-style-type: none"> <li>○ Reduced</li> <li>○ Probably reduced</li> <li>● Probably no impact</li> <li>○ Probably increased</li> <li>○ Increased</li> <li>○ Varies</li> <li>○ Don't know</li> </ul>                                                                                                        |                                                                                                                                                                                                                                             | There is no reason to assume that performing a second invasive test after a non-diagnostic initial TBLC will have an impact on health equity.                                                                                                            |
| <b>Acceptability</b><br>Is the intervention acceptable to key stakeholders?                                                                                                                                                                                                                                             |                                                                                                                                                                                                                                             |                                                                                                                                                                                                                                                          |
| <b>JUDGEMENT</b>                                                                                                                                                                                                                                                                                                        | <b>RESEARCH EVIDENCE</b>                                                                                                                                                                                                                    | <b>ADDITIONAL CONSIDERATIONS</b>                                                                                                                                                                                                                         |
| <ul style="list-style-type: none"> <li>○ No</li> <li>○ Probably no</li> <li>● Probably yes</li> <li>○ Yes</li> </ul>                                                                                                                                                                                                    | Performing SLB (or second TBLC) after a negative initial TBLC will increase diagnostic yield of the diagnostic process, as illustrated in the meta-analysis (Figure XX). However, it will also lead to additional costs and adverse events. | Some stakeholders may weigh these advantages and disadvantages in doing an additional test; others may not. Yet, in general, there is no reason to assume that an additional diagnostic procedure is considered unacceptable by any of the stakeholders. |

|                                                                                                                                                              |                          |                                                                                                                                                                                                                                                                |
|--------------------------------------------------------------------------------------------------------------------------------------------------------------|--------------------------|----------------------------------------------------------------------------------------------------------------------------------------------------------------------------------------------------------------------------------------------------------------|
| <ul style="list-style-type: none"> <li>○ Varies</li> <li>○ Don't know</li> </ul>                                                                             |                          |                                                                                                                                                                                                                                                                |
| <b>Feasibility</b><br>Is the intervention feasible to implement?                                                                                             |                          |                                                                                                                                                                                                                                                                |
| <b>JUDGEMENT</b>                                                                                                                                             | <b>RESEARCH EVIDENCE</b> | <b>ADDITIONAL CONSIDERATIONS</b>                                                                                                                                                                                                                               |
| <ul style="list-style-type: none"> <li>○ No</li> <li>○ Probably no</li> <li>○ Probably yes</li> <li>● Yes</li> <li>○ Varies</li> <li>○ Don't know</li> </ul> |                          | Both SLB and TBLC have been implemented in many healthcare centers worldwide, as illustrated by the large number of studies evaluating diagnostic yield and/or complications of TBLC (n=59) and/or SLB (n=55) in patients with ILD identified in our searches. |

## SUMMARY OF JUDGEMENTS

|                                             | JUDGEMENT                            |                                               |                                                          |                                         |                         |        |                     |
|---------------------------------------------|--------------------------------------|-----------------------------------------------|----------------------------------------------------------|-----------------------------------------|-------------------------|--------|---------------------|
| PROBLEM                                     | No                                   | Probably no                                   | Probably yes                                             | Yes                                     |                         | Varies | Don't know          |
| DESIRABLE EFFECTS                           | Trivial                              | Small                                         | Moderate                                                 | Large                                   |                         | Varies | Don't know          |
| UNDESIRABLE EFFECTS                         | Large                                | Moderate                                      | Small                                                    | Trivial                                 |                         | Varies | Don't know          |
| CERTAINTY OF EVIDENCE                       | Very low                             | Low                                           | Moderate                                                 | High                                    |                         |        | No included studies |
| VALUES                                      | Important uncertainty or variability | Possibly important uncertainty or variability | Probably no important uncertainty or variability         | No important uncertainty or variability |                         |        |                     |
| BALANCE OF EFFECTS                          | Favors the comparison                | Probably favors the comparison                | Does not favor either the intervention or the comparison | Probably favors the intervention        | Favors the intervention | Varies | Don't know          |
| RESOURCES REQUIRED                          | Large costs                          | Moderate costs                                | Negligible costs and savings                             | Moderate savings                        | Large savings           | Varies | Don't know          |
| CERTAINTY OF EVIDENCE OF REQUIRED RESOURCES | Very low                             | Low                                           | Moderate                                                 | High                                    |                         |        | No included studies |



|                    | JUDGEMENT             |                                |                                                          |                                  |                         |        |                     |
|--------------------|-----------------------|--------------------------------|----------------------------------------------------------|----------------------------------|-------------------------|--------|---------------------|
| COST EFFECTIVENESS | Favors the comparison | Probably favors the comparison | Does not favor either the intervention or the comparison | Probably favors the intervention | Favors the intervention | Varies | No included studies |
| EQUITY             | Reduced               | Probably reduced               | Probably no impact                                       | Probably increased               | Increased               | Varies | Don't know          |
| ACCEPTABILITY      | No                    | Probably no                    | Probably yes                                             | Yes                              |                         | Varies | Don't know          |
| FEASIBILITY        | No                    | Probably no                    | Probably yes                                             | Yes                              |                         | Varies | Don't know          |

### TYPE OF RECOMMENDATION

|                                                     |                                                          |                                                                               |                                                      |                                                 |
|-----------------------------------------------------|----------------------------------------------------------|-------------------------------------------------------------------------------|------------------------------------------------------|-------------------------------------------------|
| Strong recommendation against the intervention<br>○ | Conditional recommendation against the intervention<br>○ | Conditional recommendation for either the intervention or the comparison<br>○ | Conditional recommendation for the intervention<br>● | Strong recommendation for the intervention<br>○ |
|-----------------------------------------------------|----------------------------------------------------------|-------------------------------------------------------------------------------|------------------------------------------------------|-------------------------------------------------|

### CONCLUSIONS

#### Recommendation

For patients with undiagnosed ILD and a non-informative TBLC, the task force suggests performing step-up SLB if obtaining histopathological data is indicated (conditional recommendation, very low certainty of evidence).

For patients with undiagnosed ILD and a non-informative TBLC, the task force makes no recommendation about performing second TBLC if obtaining histopathological data is indicated, as there is no evidence.

#### Justification

Performing SLB after a non-diagnostic initial TBLC will improve diagnostic yield of the diagnostic process. Whether this is also the case for a second TBLC is unknown due to limited evidence; diagnostic yield is likely to be lower than for SLB. SLB (and second TBLC) are associated with additional adverse events and costs. In general, we believe that these disadvantages are outweighed by the need to obtain a diagnosis. These are all patients that had an indication to undergo TBLC for diagnosing ILD. Because initial TBLC was non-diagnostic, the indication to undergo invasive diagnostic testing remains. Therefore, the balance is probably in favor of performing an additional test. Yet, this should be decided upon on a case-by-case level by the physician in discussion with a well-informed patient, taking into account factors such as (relative) contra-indications (e.g. severe lung function or cardiac impairment) to undergo additional testing.

## Subgroup considerations

No subgroup analysis was performed in our meta-analysis, or the underlying studies.

## Implementation considerations

Both SLB and TBLC have already been implemented by many specialised clinics worldwide. Currently, clinics in which TBLC is available will most likely also be able to offer SLB.

## Monitoring and evaluation

Healthcare centers that offer step-up SLB or second TBLC after a non-informative initial TBLC are advised to collect data on important outcomes such as diagnostic yield and complications.

## Research priorities

It is advised that prospective studies are performed, evaluating the added value (in terms of diagnostic yield, adverse events and costs) of performing SLB or second TBLC after a non-diagnostic initial TBLC are performed. This can be single-arm studies (i.e. SLB or second TBLC only), or two-arm studies (ideally a randomized clinical trial) in which both tests are compared.
