# Supplementary material
Source: HighWire-hosted journal article supplement (https://erj.ersjournals.com/content/60/5/2200425)
Supplement: inline-supplementary-material-10 [file inline-supplementary-material-10.pdf]

**Appendix 10:** PICO question 4 evidence synthesis

*Tables included in this appendix:*

**Table 1:** QUADAS-2 assessment for the finally included studies in PICO question 4

**Table 2:** GRADE table for PICO question 4

**Table 3:** Evidence to decision framework for PICO question 4

**Table 1:** QUADAS-2 assessment

| Author              | Q1a.1<br>Was a<br>consecutive or<br>random sample of<br>patients enrolled? | Q1a.2<br>Was a case-<br>control design<br>avoided? | Q1a.3<br>Did the study<br>avoid<br>inappropriate<br>exclusions? | Q1a.4<br>Was the data<br>collection<br>prospective? | Could the<br>selection of<br>patients have<br>introduced bias? | Q1b<br>Are there<br>concerns that the<br>included patients<br>do not match the<br>review question? | Q2b<br>Are there<br>concerns that the<br>index test, its<br>conduct, or its<br>interpretation<br>differ from the<br>review question? | Q4a.4<br>Were all patients<br>included in the<br>analysis (2x2<br>table)? | Could the patient<br>flow have<br>introduced bias? |
|---------------------|----------------------------------------------------------------------------|----------------------------------------------------|-----------------------------------------------------------------|-----------------------------------------------------|----------------------------------------------------------------|----------------------------------------------------------------------------------------------------|--------------------------------------------------------------------------------------------------------------------------------------|---------------------------------------------------------------------------|----------------------------------------------------|
| Almeida 2017        | Unclear                                                                    | Yes                                                | No                                                              | No                                                  | Yes                                                            | No                                                                                                 | No                                                                                                                                   | Yes                                                                       | No                                                 |
| Kronborg-White 2017 | Unclear                                                                    | Yes                                                | Unclear                                                         | Yes                                                 | Unclear                                                        | No                                                                                                 | No                                                                                                                                   | Yes                                                                       | No                                                 |

**Table 2:** GRADE tables for PICO question 4.

*PICO question:*

Is formal training in TBLC recommended to optimize diagnostic yield and minimize adverse events in patients with undiagnosed ILD?

| Certainty assessment                                                                                              |                       |                        |               |                           |                           | Anticipated effects                      |                                           |                                                                                   |                                                   | Certainty        | Importance |
|-------------------------------------------------------------------------------------------------------------------|-----------------------|------------------------|---------------|---------------------------|---------------------------|------------------------------------------|-------------------------------------------|-----------------------------------------------------------------------------------|---------------------------------------------------|------------------|------------|
| № of studies                                                                                                      | Study design          | Risk of bias           | Inconsistency | Indirectness              | Imprecision               | Early procedures <sup>a</sup>            | Late procedures <sup>f</sup>              | Relative (95% CI)                                                                 | Absolute (95% CI)                                 |                  |            |
| Diagnostic yield (assessed with: Number of procedures for which TBLC provided a definitive diagnosis)             |                       |                        |               |                           |                           |                                          |                                           |                                                                                   |                                                   |                  |            |
| 1 <sup>1</sup>                                                                                                    | observational studies | serious <sup>a</sup>   | not serious   | very serious <sup>b</sup> | not serious               | 37/50 (74.0%)                            | 45/50 (90.0%)                             | OR 3.16<br>(1.03 to 9.69)                                                         | 66 more per 1.000<br>(from 3 more to 89 more)     | ⊕○○○<br>Very low | CRITICAL   |
| Median sample length (assessed with: Sample length in mm)                                                         |                       |                        |               |                           |                           |                                          |                                           |                                                                                   |                                                   |                  |            |
| 1 <sup>1</sup>                                                                                                    | observational studies | serious <sup>a</sup>   | not serious   | very serious <sup>b</sup> | not serious               | 5.0 mm<br>(range 2.5-16.0)               | 6.0 mm<br>(range 4.0-12.0)                | p<0.001 (reported by authors based on Mann-Whitney U test for median differences) | ⊕○○○<br>Very low                                  | NOT IMPORTANT    |            |
| Median sample area (assessed with: Sample area in mm <sup>3</sup> ) <sup>c-1</sup>                                |                       |                        |               |                           |                           |                                          |                                           |                                                                                   |                                                   |                  |            |
| 1 <sup>1</sup>                                                                                                    | observational studies | serious <sup>a</sup>   | not serious   | very serious <sup>b</sup> | not serious               | 17.5 mm <sup>3</sup><br>(range 6.0-42.0) | 21.5 mm <sup>3</sup><br>(range 10.0-49.0) | p<0.001 (reported by authors based on Mann-Whitney U test for median differences) | ⊕○○○<br>Very low                                  | NOT IMPORTANT    |            |
| AE: pneumothoraxes (assessed with: Occurrence of pneumothorax after TBLC)                                         |                       |                        |               |                           |                           |                                          |                                           |                                                                                   |                                                   |                  |            |
| 2 <sup>1,2</sup>                                                                                                  | observational studies | serious <sup>a</sup>   | not serious   | very serious <sup>b</sup> | serious <sup>c</sup>      | 18/70 (25.7%)                            | 10/68 (14.7%)                             | OR 0.50<br>(0.21 to 1.18)                                                         | 68 fewer per 1.000<br>(from 112 fewer to 22 more) | ⊕○○○<br>Very low | CRITICAL   |
| AE: bleedings (assessed with: Occurrence of moderate pulmonary bleedings after TBLC according to BTS definitions) |                       |                        |               |                           |                           |                                          |                                           |                                                                                   |                                                   |                  |            |
| 1 <sup>1</sup>                                                                                                    | observational studies | serious <sup>2,a</sup> | not serious   | very serious <sup>b</sup> | very serious <sup>d</sup> | 1/50 (2.0%)                              | 2/50 (4.0%)                               | OR 1.96<br>(0.17 to 22.32)                                                        | 4 more per 100<br>(from 3 fewer to 44 more)       | ⊕○○○<br>Very low | CRITICAL   |

CI: confidence interval; MD: mean difference; OR: odds ratio

## Explanations

- a. Assessed independently by two authors using QUADAS-2. Bias could have been introduced through study design and patient selection.
- b. The study did not compare training vs. no training when using TBLC. Furthermore, it is not clear what degree of training the bronchoscopist received along the way and how baseline experience regarding invasive procedures may have impacted the outcome.
- c. The 95% CI crosses 1 and includes appreciable benefit and appreciable harm.
- d. The 95% CI crosses 1, includes appreciable benefit and appreciable harm, and there are very few events.
- e. Early procedures in Almeida 2017: procedures 1-50, in Kronborg-White 2017: procedures 1-20.
- f. Late procedures in Almeida 2017: procedures 51-100, in Kronborg-White 2017: procedures 21-38.

## References

1. Almeida LM, Lima B, Mota PC, et al. Learning curve for transbronchial lung cryobiopsy in diffuse lung disease. Rev Port Pneumol (Barc). 2017;22:22.
2. Kronborg-White S, Folkersen B, Rasmussen TR, et al. Introduction of cryobiopsies in the diagnostics of interstitial lung diseases - experiences in a referral center. Eur Clin Respir J. 2017;4(1):1274099.

**Table 3:** Evidence-to-Decision framework for PICO question 4.

*PICO question:*

Is formal training in TBLC recommended to optimize diagnostic yield and minimize adverse events in patients with undiagnosed ILD?

| Problem                                                                                                                                                      |                                                                                                                                                                                                                                                                                                                                                                                                                                                                                                                                                                                                                                                                                                                                                       |                           |
|--------------------------------------------------------------------------------------------------------------------------------------------------------------|-------------------------------------------------------------------------------------------------------------------------------------------------------------------------------------------------------------------------------------------------------------------------------------------------------------------------------------------------------------------------------------------------------------------------------------------------------------------------------------------------------------------------------------------------------------------------------------------------------------------------------------------------------------------------------------------------------------------------------------------------------|---------------------------|
| Is the problem a priority?                                                                                                                                   |                                                                                                                                                                                                                                                                                                                                                                                                                                                                                                                                                                                                                                                                                                                                                       |                           |
| JUDGEMENT                                                                                                                                                    | RESEARCH EVIDENCE                                                                                                                                                                                                                                                                                                                                                                                                                                                                                                                                                                                                                                                                                                                                     | ADDITIONAL CONSIDERATIONS |
| <ul style="list-style-type: none"> <li>○ No</li> <li>○ Probably no</li> <li>○ Probably yes</li> <li>● Yes</li> <li>○ Varies</li> <li>○ Don't know</li> </ul> | <p>The prevalence of interstitial lung disease (ILD) is estimated to be 6.3-76.0 per 100,000 people in Europe, and 74.3 per 100,000 in the USA. Of these 13-40% are estimated to develop progressive fibrosing ILD, with an overall prevalence estimate of 2.2-20.0 per 100,000 in Europe, and 28.0 per 100,000 in the USA. This represents a considerable fraction of chronic respiratory disorders (<i>Olson et al. Advances in Therapy 2021: 38:854-867</i>). Currently, surgical lung biopsy (SLB) is often performed in these patients, with high costs and high complication rates. Transbronchial Lung Cryobiopsy (TBLC) might be a reasonable diagnostic alternative to SLB. The impact of formal TBLC training on outcomes is uncertain.</p> |                           |
| Desirable Effects                                                                                                                                            |                                                                                                                                                                                                                                                                                                                                                                                                                                                                                                                                                                                                                                                                                                                                                       |                           |
| How substantial are the desirable anticipated effects?                                                                                                       |                                                                                                                                                                                                                                                                                                                                                                                                                                                                                                                                                                                                                                                                                                                                                       |                           |
| JUDGEMENT                                                                                                                                                    | RESEARCH EVIDENCE                                                                                                                                                                                                                                                                                                                                                                                                                                                                                                                                                                                                                                                                                                                                     | ADDITIONAL CONSIDERATIONS |
| <ul style="list-style-type: none"> <li>○ Trivial</li> <li>○ Small</li> <li>○ Moderate</li> <li>○ Large</li> <li>○ Varies</li> <li>● Don't know</li> </ul>    | <p>-Desirable effects of formal training in TBLC could not be evaluated Two studies were included that reported some of the prioritized outcomes in early and late procedures, reflecting the impact of increasing experience on procedure outcomes</p> <p>-No information about bronchoscopists' baseline TBLC experience or the amount of training they received</p>                                                                                                                                                                                                                                                                                                                                                                                |                           |
| Undesirable Effects                                                                                                                                          |                                                                                                                                                                                                                                                                                                                                                                                                                                                                                                                                                                                                                                                                                                                                                       |                           |
| How substantial are the undesirable anticipated effects?                                                                                                     |                                                                                                                                                                                                                                                                                                                                                                                                                                                                                                                                                                                                                                                                                                                                                       |                           |
| JUDGEMENT                                                                                                                                                    | RESEARCH EVIDENCE                                                                                                                                                                                                                                                                                                                                                                                                                                                                                                                                                                                                                                                                                                                                     | ADDITIONAL CONSIDERATIONS |
| <ul style="list-style-type: none"> <li>○ Large</li> <li>○ Moderate</li> <li>○ Small</li> <li>○ Trivial</li> </ul>                                            | <p>-Undesirable effects of formal training in TBLC could not be evaluated</p> <p>-Two studies were included that reported some of the prioritized outcomes in early and late procedures, reflecting the impact of increasing experience on procedure outcomes</p>                                                                                                                                                                                                                                                                                                                                                                                                                                                                                     |                           |

|                                                                                  |                                                                                                         |  |
|----------------------------------------------------------------------------------|---------------------------------------------------------------------------------------------------------|--|
| <ul style="list-style-type: none"> <li>○ Varies</li> <li>● Don't know</li> </ul> | -No information about bronchoscopists' baseline TBLC experience or the amount of training they received |  |
|----------------------------------------------------------------------------------|---------------------------------------------------------------------------------------------------------|--|

### Certainty of evidence

What is the overall certainty of the evidence of effects?

| JUDGEMENT                                                                                                                                      | RESEARCH EVIDENCE                                 | ADDITIONAL CONSIDERATIONS |
|------------------------------------------------------------------------------------------------------------------------------------------------|---------------------------------------------------|---------------------------|
| <ul style="list-style-type: none"> <li>● Very low</li> <li>○ Low</li> <li>○ Moderate</li> <li>○ High</li> <li>○ No included studies</li> </ul> | The overall certainty of evidence was “very low”. |                           |

### Values

Is there important uncertainty about or variability in how much people value the main outcomes?

| JUDGEMENT                                                                                                                                                                                                                                                        | RESEARCH EVIDENCE | ADDITIONAL CONSIDERATIONS                                                                                                                                                                                          |
|------------------------------------------------------------------------------------------------------------------------------------------------------------------------------------------------------------------------------------------------------------------|-------------------|--------------------------------------------------------------------------------------------------------------------------------------------------------------------------------------------------------------------|
| <ul style="list-style-type: none"> <li>○ Important uncertainty or variability</li> <li>● Possibly important uncertainty or variability</li> <li>○ Probably no important uncertainty or variability</li> <li>○ No important uncertainty or variability</li> </ul> |                   | Most probably, the values of the various outcomes vary in-between stakeholders. Some believe in a high value of training programs, e.g., using simulators and educational programs, some prefer clinical training. |

### Balance of effects

Does the balance between desirable and undesirable effects favor the intervention or the comparison?

| JUDGEMENT                                                                                                                                                                                                                                                                                                      | RESEARCH EVIDENCE                                                                                                                                                                      | ADDITIONAL CONSIDERATIONS                                                  |
|----------------------------------------------------------------------------------------------------------------------------------------------------------------------------------------------------------------------------------------------------------------------------------------------------------------|----------------------------------------------------------------------------------------------------------------------------------------------------------------------------------------|----------------------------------------------------------------------------|
| <ul style="list-style-type: none"> <li>○ Favors the comparison</li> <li>○ Probably favors the comparison</li> <li>○ Does not favor either the intervention or the comparison</li> <li>○ Probably favors the intervention</li> <li>○ Favors the intervention</li> <li>○ Varies</li> <li>● Don't know</li> </ul> | We could not evaluate whether formal TBLC training had more desirable or undesirable effects on the prioritized outcomes because none of the studies evaluated the effect of training. | Probably high variability depending on the design of the training program. |

## Resources required

How large are the resource requirements (costs)?

| JUDGEMENT                                                                                                                                                                                                              | RESEARCH EVIDENCE                                                                   | ADDITIONAL CONSIDERATIONS                                                                                                                                                                                                                        |
|------------------------------------------------------------------------------------------------------------------------------------------------------------------------------------------------------------------------|-------------------------------------------------------------------------------------|--------------------------------------------------------------------------------------------------------------------------------------------------------------------------------------------------------------------------------------------------|
| <ul style="list-style-type: none"><li>○ Large costs</li><li>○ Moderate costs</li><li>○ Negligible costs and savings</li><li>○ Moderate savings</li><li>○ Large savings</li><li>○ Varies</li><li>● Don't know</li></ul> | No cost-benefit analyses for formal TBLC training are, to our knowledge, available. | The costs will depend on the design of the formal training. From a logical point of view, formal TBLC training will most certainly cost more than no training. However, one must take possible beneficial effects on TBLC outcomes into account. |

## Certainty of evidence of required resources

What is the certainty of the evidence of resource requirements (costs)?

| JUDGEMENT                                                                                                                                | RESEARCH EVIDENCE                                                                   | ADDITIONAL CONSIDERATIONS |
|------------------------------------------------------------------------------------------------------------------------------------------|-------------------------------------------------------------------------------------|---------------------------|
| <ul style="list-style-type: none"><li>○ Very low</li><li>○ Low</li><li>○ Moderate</li><li>○ High</li><li>● No included studies</li></ul> | No cost-benefit analyses for formal TBLC training are, to our knowledge, available. |                           |

## Cost effectiveness

Does the cost-effectiveness of the intervention favor the intervention or the comparison?

| JUDGEMENT                                                                                                                                                                                                                                                                                                       | RESEARCH EVIDENCE                                                                   | ADDITIONAL CONSIDERATIONS |
|-----------------------------------------------------------------------------------------------------------------------------------------------------------------------------------------------------------------------------------------------------------------------------------------------------------------|-------------------------------------------------------------------------------------|---------------------------|
| <ul style="list-style-type: none"><li>○ Favors the comparison</li><li>○ Probably favors the comparison</li><li>○ Does not favor either the intervention or the comparison</li><li>○ Probably favors the intervention</li><li>○ Favors the intervention</li><li>○ Varies</li><li>● No included studies</li></ul> | No cost-benefit analyses for formal TBLC training are, to our knowledge, available. |                           |

## Equity

What would be the impact on health equity?

| JUDGEMENT                                                                                                                                                                                                | RESEARCH EVIDENCE | ADDITIONAL CONSIDERATIONS                                                                                                                                                         |
|----------------------------------------------------------------------------------------------------------------------------------------------------------------------------------------------------------|-------------------|-----------------------------------------------------------------------------------------------------------------------------------------------------------------------------------|
| <ul style="list-style-type: none"><li>○ Reduced</li><li>○ Probably reduced</li><li>○ Probably no impact</li><li>○ Probably increased</li><li>○ Increased</li><li>○ Varies</li><li>● Don't know</li></ul> | None.             | Certain patient groups, especially those with more co-morbidities and/or lower lung function, may benefit from formal training, e.g. in simulators or patients with less frailty. |

## Acceptability

Is the intervention acceptable to key stakeholders?

| JUDGEMENT                                                                                                                                             | RESEARCH EVIDENCE | ADDITIONAL CONSIDERATIONS                                                                                                                 |
|-------------------------------------------------------------------------------------------------------------------------------------------------------|-------------------|-------------------------------------------------------------------------------------------------------------------------------------------|
| <ul style="list-style-type: none"><li>○ No</li><li>○ Probably no</li><li>● Probably yes</li><li>○ Yes</li><li>○ Varies</li><li>○ Don't know</li></ul> | None.             | Depending on the design and implementation of formal TBLC training, we consider that it would probably be acceptable to key stakeholders. |

## Feasibility

Is the intervention feasible to implement?

| JUDGEMENT                                                                                                                                             | RESEARCH EVIDENCE | ADDITIONAL CONSIDERATIONS                                                                                     |
|-------------------------------------------------------------------------------------------------------------------------------------------------------|-------------------|---------------------------------------------------------------------------------------------------------------|
| <ul style="list-style-type: none"><li>○ No</li><li>○ Probably no</li><li>○ Probably yes</li><li>○ Yes</li><li>● Varies</li><li>○ Don't know</li></ul> | None.             | The feasibility of formal TBLC training will probably depend on design, implementation, and local conditions. |



SUMMARY OF JUDGEMENTS

|                                             | JUDGEMENT                            |                                               |                                                          |                                         |                         |        |                     |
|---------------------------------------------|--------------------------------------|-----------------------------------------------|----------------------------------------------------------|-----------------------------------------|-------------------------|--------|---------------------|
| PROBLEM                                     | No                                   | Probably no                                   | Probably yes                                             | Yes                                     |                         | Varies | Don't know          |
| DESIRABLE EFFECTS                           | Trivial                              | Small                                         | Moderate                                                 | Large                                   |                         | Varies | Don't know          |
| UNDESIRABLE EFFECTS                         | Large                                | Moderate                                      | Small                                                    | Trivial                                 |                         | Varies | Don't know          |
| CERTAINTY OF EVIDENCE                       | Very low                             | Low                                           | Moderate                                                 | High                                    |                         |        | No included studies |
| VALUES                                      | Important uncertainty or variability | Possibly important uncertainty or variability | Probably no important uncertainty or variability         | No important uncertainty or variability |                         |        |                     |
| BALANCE OF EFFECTS                          | Favors the comparison                | Probably favors the comparison                | Does not favor either the intervention or the comparison | Probably favors the intervention        | Favors the intervention | Varies | Don't know          |
| RESOURCES REQUIRED                          | Large costs                          | Moderate costs                                | Negligible costs and savings                             | Moderate savings                        | Large savings           | Varies | Don't know          |
| CERTAINTY OF EVIDENCE OF REQUIRED RESOURCES | Very low                             | Low                                           | Moderate                                                 | High                                    |                         |        | No included studies |
| COST EFFECTIVENESS                          | Favors the comparison                | Probably favors the comparison                | Does not favor either the intervention or the comparison | Probably favors the intervention        | Favors the intervention | Varies | No included studies |
| EQUITY                                      | Reduced                              | Probably reduced                              | Probably no impact                                       | Probably increased                      | Increased               | Varies | Don't know          |
| ACCEPTABILITY                               | No                                   | Probably no                                   | Probably yes                                             | Yes                                     |                         | Varies | Don't know          |
| FEASIBILITY                                 | No                                   | Probably no                                   | Probably yes                                             | Yes                                     |                         | Varies | Don't know          |

TYPE OF RECOMMENDATION

|                                                     |                                                          |                                                                               |                                                      |                                                 |
|-----------------------------------------------------|----------------------------------------------------------|-------------------------------------------------------------------------------|------------------------------------------------------|-------------------------------------------------|
| Strong recommendation against the intervention<br>○ | Conditional recommendation against the intervention<br>○ | Conditional recommendation for either the intervention or the comparison<br>○ | Conditional recommendation for the intervention<br>○ | Strong recommendation for the intervention<br>○ |
|-----------------------------------------------------|----------------------------------------------------------|-------------------------------------------------------------------------------|------------------------------------------------------|-------------------------------------------------|

## CONCLUSIONS

### Recommendation

The task force suggests that TBLC-operators should undergo training (conditional recommendation, 'very low' certainty of evidence), but a recommendation on the optimal type of training cannot be made due to lack of evidence.

### Justification

The task force considers training crucial, as diagnostic yield increases and adverse events decrease with operator experience. For other invasive procedures, it has been shown that formal training programs can increase operator experience. No studies have, so far, evaluated the impact of formal TBLC training on outcomes in TBLC. However, the task force believes that a certain level of experience is indeed needed to perform TBLC in a safe and effective way and formal training can be the way to gain this experience. Further research is needed to establish the impact of formal training on outcomes in TBLC and we, hereby, strongly recommend to design and conduct studies evaluating formal training programs in TBLC.

### Subgroup considerations

Patients with different frailty levels or co-morbidities (high- vs. low-risk groups) may benefit in various degrees of TBLC training.

### Implementation considerations

If implemented, formal TBLC training programs must be developed and defined properly. We recommend an implementation under protocolled conditions.

### Monitoring and evaluation

If implemented, the impact of formal TBLC training programs must be monitored closely by evaluating – as a minimum – all outcomes prioritized as critical (diagnostic yield, diagnostic accuracy, adverse events, mortality, survival, learning curves) or important (diagnostic confidence, quality of life, lung function, exercise tolerance, costs).

### Research priorities

Studies on the impact of formal training on TBLC outcomes are urgently needed. Firstly, formal training programs must be defined and developed. Secondly, we recommend direct comparisons of formal training programs and no formal TBLC training on the outcomes. This can either be done by performing a randomized trial, or by performing observational studies which include bronchoscopists undergoing different types of training. We recommend that future studies evaluate – as a minimum – all outcomes prioritized as critical (diagnostic yield, diagnostic accuracy, adverse events, mortality, survival, learning curves) or important (diagnostic confidence, quality of life, lung function, exercise tolerance, costs).
