# Supplementary material
Source: HighWire-hosted journal article supplement (https://erj.ersjournals.com/content/60/5/2200425)
Supplement: inline-supplementary-material-11 [file inline-supplementary-material-11.pdf]

**Appendix 11:** Narrative question 2 evidence synthesis

*Tables and figures included in this appendix:*

**Table 1:** Studies reporting on complication or mortality rates in patients at high procedural risk only

**Table 2:** Studies comparing complication or mortality rates in subgroups of patients at high versus low procedural risk

**Table 1:** Studies reporting on complication or mortality rates of TBLC in patients with ILD at high procedural risk only

| First author<br>Year<br>Country    | Specification of high risk group                                  | Total number of patients at high procedural risk undergoing TBLC | Complications:<br>Pneumothorax                                                                                                                                                                                           | Complications:<br>Bleeding                                                                                                        | Complications:<br>Other                                                                   | Mortality                                   |
|------------------------------------|-------------------------------------------------------------------|------------------------------------------------------------------|--------------------------------------------------------------------------------------------------------------------------------------------------------------------------------------------------------------------------|-----------------------------------------------------------------------------------------------------------------------------------|-------------------------------------------------------------------------------------------|---------------------------------------------|
| <b>Matta A</b> , 2021<br>USA       | -Critically ill patients with acute hypoxemic respiratory failure | n=17                                                             | <i>Pneumothorax:</i><br>-n=6 (35.3%)<br><br><i>Pneumothorax requiring drainage:</i><br>-n=5 (29.4%)<br><br><i>Pneumothorax with persistent air leak (&gt; 5 days):</i><br>-n=4 (23.5%)                                   | <i>Moderate bleeding:</i><br>-n=1 (5.9%)<br><br><i>Severe bleeding:</i><br>-n=0 (0%)                                              | <i>Moderate hemorrhage:</i><br>-n= 1 (5.9%)<br><br><i>Severe hemorrhage:</i><br>-n=0 (0%) | <i>Mortality at 8 days:</i><br>-n=8 (47.1%) |
| <b>Ravaglia C</b><br>2019<br>Italy | -Patients with FVC <50% and/or DLCO <35%                          | n=31                                                             | <i>Pneumothorax:</i><br>-n=6 (19.4%)<br><br><i>Pneumothorax requiring drainage:</i><br>-n=5 (16.1%)                                                                                                                      | <i>Mild bleeding:</i><br>-n=2 (6.4%)<br><br><i>Moderate bleeding:</i><br>-n=4 (12.9%)<br><br><i>Severe bleeding:</i><br>-n=0 (0%) | Other (empyema)<br>-n=1 (3.2%)                                                            | NR                                          |
| <b>She S</b><br>2020<br>Australia  | -Patients with DLCO <40%                                          | n=15                                                             | “In our cohort, 15 (12.4%) patients had a diffusing capacity of the lungs for carbon monoxide <40%, but we did not note differences in the rate of complications in this subgroup.”<br>No further details were reported. |                                                                                                                                   |                                                                                           | NR                                          |

**Legend:**

Abbreviations: DLCO = diffusing capacity for carbon monoxide. FVC = forced vital capacity. ILD = interstitial lung disease. NR = not reported. TBLC = transbronchial lung cryobiopsy.

**Table 2:** Studies comparing complication or mortality rates of TBLC in subgroups of patients with ILD at high versus low procedural risk

| First author<br>Year<br>Country       | Specification of high risk group and low risk group                                                                                                                                                                                                                                                                                                                                                                                                                                                                                                                                                                                                                                                                                                                | Total number of patients undergoing TBLC per subgroup                                                                                                                                                                                                                                                                                                                                                                                                                                                                                                                                                                                      | Complications:<br>Pneumothorax                                                                                                                                                                                                                                                                                                                                                                                                                                                                                                                                                                                              | Complications:<br>Bleeding                                                                                                                                                                                                                                                                                                                                                                                                                                                                                                                                                                                                                                                 | Complications:<br>Other                                                                                                                                                                                                                                                                                                                                                                                                                | Mortality                                                                                                                                                                                           |
|---------------------------------------|--------------------------------------------------------------------------------------------------------------------------------------------------------------------------------------------------------------------------------------------------------------------------------------------------------------------------------------------------------------------------------------------------------------------------------------------------------------------------------------------------------------------------------------------------------------------------------------------------------------------------------------------------------------------------------------------------------------------------------------------------------------------|--------------------------------------------------------------------------------------------------------------------------------------------------------------------------------------------------------------------------------------------------------------------------------------------------------------------------------------------------------------------------------------------------------------------------------------------------------------------------------------------------------------------------------------------------------------------------------------------------------------------------------------------|-----------------------------------------------------------------------------------------------------------------------------------------------------------------------------------------------------------------------------------------------------------------------------------------------------------------------------------------------------------------------------------------------------------------------------------------------------------------------------------------------------------------------------------------------------------------------------------------------------------------------------|----------------------------------------------------------------------------------------------------------------------------------------------------------------------------------------------------------------------------------------------------------------------------------------------------------------------------------------------------------------------------------------------------------------------------------------------------------------------------------------------------------------------------------------------------------------------------------------------------------------------------------------------------------------------------|----------------------------------------------------------------------------------------------------------------------------------------------------------------------------------------------------------------------------------------------------------------------------------------------------------------------------------------------------------------------------------------------------------------------------------------|-----------------------------------------------------------------------------------------------------------------------------------------------------------------------------------------------------|
| <b>Bondue B</b><br>2021<br>Belgium    | <p><i>Risk:</i></p> <ul style="list-style-type: none"> <li>-High-risk patients (defined as presence of any of the following: age <math>\geq 75</math>-years, BMI <math>\geq 35</math>, sPAP by echocardiography <math>\geq 45</math> mmHg, FVC <math>&lt; 50\%</math>, DLCO <math>&lt; 30\%</math>, and/or significant cardiac comorbidities with reduced heart ejection fraction)</li> <li>-Low-risk patients (not fulfilling the definition of high-risk)</li> </ul> <p><i>Additional subgroups:</i></p> <ul style="list-style-type: none"> <li>-Subgroup of BMI <math>\geq 35</math> versus low risk patients</li> <li>-Subgroup of severe pulmonary impairment (FVC <math>&lt; 50\%</math> or DLCO <math>&lt; 30\%</math>) versus low risk patients</li> </ul> | <p><i>High-risk patients:</i></p> <ul style="list-style-type: none"> <li>-n=38 (40%)</li> <li>-n=15 BMI <math>\geq 35</math></li> <li>-n=15 severe pulmonary impairment</li> <li>-n=4 sPAP <math>\geq 45</math> mmHg</li> <li>-n=4 <math>\geq 75</math>-year-old</li> <li>-n=3 cardiac comorbidities)</li> </ul> <p><i>Low-risk patients:</i></p> <ul style="list-style-type: none"> <li>-n=58 (60%)</li> </ul> <p><i>Subgroup of BMI <math>\geq 35</math>:</i></p> <ul style="list-style-type: none"> <li>-n=15</li> </ul> <p><i>Subgroup of severe pulmonary impairment:</i></p> <ul style="list-style-type: none"> <li>-n=15</li> </ul> | <p><i>Pneumothorax:</i></p> <ul style="list-style-type: none"> <li>-n=5 (13.2%) in high-risk patients</li> <li>-n=12 (20.7%) in low-risk patients</li> <li>-p=0.419</li> </ul> <p>-n=1 (6.7%) in the subgroup of patients with BMI <math>\geq 35</math> (p=0.206 compared to low-risk patients)</p> <p>-n=1 (6.7%) in the subgroup of patients with severe pulmonary impairment (p=0.316 compared to low-risk patients)</p> <p><i>Pneumothorax requiring drainage:</i></p> <ul style="list-style-type: none"> <li>-n=3 (7.9%) in high-risk patients</li> <li>-n=6 (10.3%) in low-risk patients</li> <li>-p=0.687</li> </ul> | <p><i>Mild bleeding:</i></p> <ul style="list-style-type: none"> <li>-n=24 (63.2%) in high-risk patients</li> <li>-n=36 (62.1%) in low-risk patients</li> <li>-p=0.914</li> </ul> <p><i>Moderate bleeding:</i></p> <ul style="list-style-type: none"> <li>-n=11 (28.9%) in high-risk patients</li> <li>-n=17 (29.3%) in low-risk patients</li> <li>-p=0.969</li> </ul> <p><i>Severe bleeding:</i></p> <ul style="list-style-type: none"> <li>-n=1 (2.6%) in high-risk patients</li> <li>-n=3 (5.2%) in low-risk patients</li> <li>-p=0.542</li> <li>-no difference for sub-groups BMI <math>\geq 35</math> and severe pulmonary impairment (no numbers reported)</li> </ul> | <p><i>Median hospital stay:</i></p> <ul style="list-style-type: none"> <li>-1 day (range 1-12) in high-risk patients</li> <li>-1 day (range 1-107) in low-risk patients</li> <li>-p=0.675</li> </ul> <p><i>Other complications:</i></p> <ul style="list-style-type: none"> <li>-n=0 in high-risk patients</li> <li>-n=3 in low-risk patients (n=1: acute exacerbation, n=1: empyema, n=1: seizure 24 hours after procedure)</li> </ul> | <p><i>Mortality:</i></p> <ul style="list-style-type: none"> <li>-n=1 (2.6%) in high-risk patients (possible acute embolic and/or coronary event)</li> <li>-n=0 (0%) in low-risk patients</li> </ul> |
| <b>Cooley J</b><br>2018<br>USA        | <p><i>Hospitalization:</i></p> <ul style="list-style-type: none"> <li>-Hospitalized patients</li> <li>-Outpatients</li> </ul> <p><i>(Patients were hospitalized for respiratory failure, fatigue or acute kidney injury)</i></p>                                                                                                                                                                                                                                                                                                                                                                                                                                                                                                                                   | <p><i>Hospitalized patients:</i></p> <ul style="list-style-type: none"> <li>-n=17 (11%)</li> <li>-n=15 due to respiratory failure</li> <li>-n=1 due to fatigue</li> <li>-n=1 due to kidney injury</li> </ul> <p><i>Outpatients:</i></p> <ul style="list-style-type: none"> <li>-n=142 (89%)</li> </ul>                                                                                                                                                                                                                                                                                                                                     | <p><i>Pneumothorax:</i></p> <ul style="list-style-type: none"> <li>-n=4 (23.5%) in hospitalized patients</li> <li>-n=14 (9.9%) in outpatients</li> <li>-p=0.11</li> </ul> <p><i>Persistent air leak:</i></p> <ul style="list-style-type: none"> <li>-n=1 (5.9%) in hospitalized patients</li> <li>-n=1 (0.7%) in outpatients</li> <li>-p=0.20</li> </ul>                                                                                                                                                                                                                                                                    | NR                                                                                                                                                                                                                                                                                                                                                                                                                                                                                                                                                                                                                                                                         | <p><i>ICU transfer within 48 h:</i></p> <ul style="list-style-type: none"> <li>-n=2 (11.8%) in hospitalized patients</li> <li>-n=3 (2.1%) in outpatients</li> <li>-p=0.09</li> </ul>                                                                                                                                                                                                                                                   | <p><i>Mortality at 30 days:</i></p> <ul style="list-style-type: none"> <li>-n=1 (5.9%) in hospitalized patients</li> <li>-n=2 (1.4%) in outpatients</li> <li>-p=0.29</li> </ul>                     |
| <b>Gershman E,</b><br>2015<br>Germany | <p><i>Risk:</i></p> <ul style="list-style-type: none"> <li>-Post-lung-transplantation patients</li> <li>-Immunocompromised patients</li> <li>-Other (non-high-risk) patients with DLD</li> </ul>                                                                                                                                                                                                                                                                                                                                                                                                                                                                                                                                                                   | <p><i>Post-lung-transplantation:</i></p> <ul style="list-style-type: none"> <li>-n= 146 (49%)</li> </ul> <p><i>Immunocompromised:</i></p> <ul style="list-style-type: none"> <li>-n= 18 (6%)</li> </ul> <p><i>Other patients with DLD:</i></p> <ul style="list-style-type: none"> <li>-n=139 (46%)</li> </ul>                                                                                                                                                                                                                                                                                                                              | <p><i>Pneumothorax:</i></p> <ul style="list-style-type: none"> <li>-n=5 (3.4%) in post-lung-transplantation</li> <li>-n=2 (11.1%) in immunocompromised</li> <li>-n=8 (5.8%) in other DLD patients</li> <li>-p-value NR</li> </ul> <p><i>Pneumothorax requiring drainage:</i></p> <ul style="list-style-type: none"> <li>-n=1 (0.7%) in post-lung-transplantation</li> <li>-n=2 (11.1%) in immunocompromised</li> <li>-n=3 (2.2%) in other DLD patients</li> <li>-p-value NR</li> </ul>                                                                                                                                      | <p><i>Bleeding:</i></p> <ul style="list-style-type: none"> <li>-n=6 (4.1%) in post-lung-transplantation</li> <li>-n=3 (16.6%) in immunocompromised</li> <li>-n=7 (5.0%) in other DLD patients</li> <li>-p-value NR</li> </ul>                                                                                                                                                                                                                                                                                                                                                                                                                                              | <p><i>Hospitalization:</i></p> <ul style="list-style-type: none"> <li>-n=3 (2.1%) in post-lung-transplantation</li> <li>-n=1 (5.6%) in immunocompromised</li> <li>-n=6 (4.3%) in other DLD patients</li> <li>-p-value NR</li> </ul>                                                                                                                                                                                                    | NR                                                                                                                                                                                                  |
| <b>Hetzel J</b><br>2019<br>Germany    | <p><i>Age:</i></p> <ul style="list-style-type: none"> <li>-Age <math>&lt; 65</math> years</li> <li>-Age <math>\geq 65</math> years</li> </ul> <p><i>Aspirin use:</i></p> <ul style="list-style-type: none"> <li>-Aspirin use</li> <li>-No aspirin use</li> </ul>                                                                                                                                                                                                                                                                                                                                                                                                                                                                                                   | <p><i>Age <math>&lt; 65</math> years:</i></p> <ul style="list-style-type: none"> <li>-n=160 (46%)</li> </ul> <p><i>Age <math>\geq 65</math> years:</i></p> <ul style="list-style-type: none"> <li>-n=189 (54%)</li> </ul> <p><i>Aspirin use:</i></p> <ul style="list-style-type: none"> <li>-n=51 (14%)</li> </ul>                                                                                                                                                                                                                                                                                                                         | -NR                                                                                                                                                                                                                                                                                                                                                                                                                                                                                                                                                                                                                         | <p><i>Moderate/severe bleeding:</i></p> <ul style="list-style-type: none"> <li>-n=17 (10.6%) in patients <math>&lt; 65</math> years</li> <li>-n=38 (20.1%) in patients <math>\geq 65</math> years</li> <li>-p=0.018</li> </ul> <ul style="list-style-type: none"> <li>-n=13 (25.5%) in patients with aspirin use</li> <li>-n=45 (14.9%) in patients with no aspirin use</li> </ul>                                                                                                                                                                                                                                                                                         | NR                                                                                                                                                                                                                                                                                                                                                                                                                                     | NR                                                                                                                                                                                                  |

|                                             |                                                                                                                                                                                                     |                                                                                                                                                                                                                |                                                                                 |                                                                                                                                |                                                                                                                                                                                                  |                                                                                                           |
|---------------------------------------------|-----------------------------------------------------------------------------------------------------------------------------------------------------------------------------------------------------|----------------------------------------------------------------------------------------------------------------------------------------------------------------------------------------------------------------|---------------------------------------------------------------------------------|--------------------------------------------------------------------------------------------------------------------------------|--------------------------------------------------------------------------------------------------------------------------------------------------------------------------------------------------|-----------------------------------------------------------------------------------------------------------|
|                                             |                                                                                                                                                                                                     | No aspirin use:<br>-n=303 (86%)                                                                                                                                                                                |                                                                                 | -p=0.067                                                                                                                       |                                                                                                                                                                                                  |                                                                                                           |
| <b>Kronborg-White S,</b><br>2021<br>Denmark | Anticoagulant therapy:<br>-Anticoagulant therapy<br>-No anticoagulant therapy<br><br>(All patients ceased individual anticoagulant treatment before the procedure according to national guidelines) | Anticoagulant therapy:<br>-n= 86<br>-n=64: Acetyl salicylic acid<br>-n=13: Thrombocyte inhibitors<br>-n=15: New oral anticoagulants<br>-n=18: Vitamin K antagonists<br><br>No anticoagulant therapy:<br>-n=164 | NR                                                                              | Moderate or severe bleeding:<br>-n=19 (22.1%) in anticoagulant therapy<br>-n=36 (22.0%) in no anticoagulant therapy<br>-p=0.98 | NR                                                                                                                                                                                               | NR                                                                                                        |
| <b>Kropski JA,</b><br>2013<br>USA           | Hospitalization:<br>-Hospitalized patients<br>-Outpatients<br><br>(Reasons for hospitalization NR; unclear if this is related to respiratory state)                                                 | Hospitalized patients:<br>-n=4 (11%)<br><br>Outpatients:<br>-n= 33 (89%)                                                                                                                                       | Pneumothorax:<br>-n=0 (0%) in hospitalized patients<br>-n=0 (0%) in outpatients | Bleeding:<br>-n=0 (0%) in hospitalized patients<br>-n=0 (0%) in outpatients                                                    | Other complications:<br>-n=1 (25.0%) for hospitalized patients (n=1: ICU admission for post-procedural hypoxemia for 1 day)<br>-n=1 (3.0%) for outpatients (n=1: hospitalization for hemoptysis) | NR                                                                                                        |
| <b>Pannu J</b><br>2019<br>USA               | Hospitalization:<br>-Hospitalized patients<br>-Outpatients<br><br>(Reasons for hospitalization NR; unclear if this is related to respiratory state)                                                 | Hospitalized patients:<br>-n=8 (4.1%)<br><br>Outpatients:<br>-n=189 (95.9%)                                                                                                                                    | NR                                                                              | NR                                                                                                                             | NR                                                                                                                                                                                               | Mortality at 30 days:<br>-n=2 (25%) in hospitalized patients<br>-n=2 (1.1%) in outpatients<br>-p-value NR |

**Legend:**

Abbreviations: BMI = body mass index. DLCO = diffusing capacity for carbon monoxide. DLD = diffuse lung disease. FVC = forced vital capacity. ICU = intensive care unit. ILD = interstitial lung disease. NR = not reported. sPAP = systolic pulmonary artery pressure. TBLC = transbronchial lung cryobiopsy.
