# Supplementary material
Source: HighWire-hosted journal article supplement (https://erj.ersjournals.com/content/60/5/2200425)
Supplement: inline-supplementary-material-14 [file inline-supplementary-material-14.pdf]

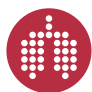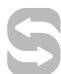

SHAREABLE PDF

# European Respiratory Society guidelines on transbronchial lung cryobiopsy in the diagnosis of interstitial lung diseases

Daniël A. Korevaar<sup>1</sup>, Sara Colella<sup>2</sup>, Markus Fally<sup>3</sup>, Juliette Camuset<sup>4</sup>, Thomas V. Colby<sup>5</sup>, Lars Hagmeyer<sup>6,7</sup>, Juergen Hetzel<sup>8,9</sup>, Fabien Maldonado<sup>10</sup>, Antonio Morais<sup>11,12,13</sup>, Claudia Ravaglia<sup>14,15</sup>, René Spijker<sup>16,17</sup>, Sara Tomassetti<sup>15,18</sup>, Lauren K. Troy<sup>19,20</sup>, Johnny A. Verschakelen<sup>21</sup>, Athol U. Wells<sup>22,23</sup>, Thomy Tonia<sup>24</sup>, Jouke T. Annema<sup>1,25</sup> and Venerino Poletti<sup>14,15,25</sup>

<sup>1</sup>Dept of Respiratory Medicine, Amsterdam University Medical Centers, University of Amsterdam, Amsterdam, The Netherlands. <sup>2</sup>Pulmonary Unit, "G. Mazzini" Hospital, Teramo, Italy. <sup>3</sup>Dept of Respiratory Medicine, Copenhagen University Hospital – Bispebjerg and Frederiksberg, Copenhagen, Denmark. <sup>4</sup>Dept of Thoracic and Vascular Surgery, Tenon Hospital, AP-HP, Paris, France. <sup>5</sup>Dept of Laboratory Medicine and Pathology (Emeritus), Mayo Clinic, Scottsdale, AZ, USA. <sup>6</sup>Bethanien Hospital Solingen, Clinic for Pneumology and Allergology, Center for Sleep Medicine and Respiratory Care, Solingen, Germany. <sup>7</sup>Institute of Pneumology, University of Cologne, Solingen, Germany. <sup>8</sup>Dept of Medical Oncology and Pulmonary Medicine, University Hospital Tuebingen, Tuebingen, Germany. <sup>9</sup>Dept of Internal Medicine, Division of Pneumology, Kantonsspital Winterthur, Winterthur, Switzerland. <sup>10</sup>Vanderbilt University Medical Center, Nashville, TN, USA. <sup>11</sup>Dept of Pulmonology, Centro Hospitalar e Universitário São João, Porto, Portugal. <sup>12</sup>Faculty of Medicine, University of Porto, Porto, Portugal. <sup>13</sup>Instituto de Investigação e Inovação em Saúde, University of Porto, Porto, Portugal. <sup>14</sup>Dept of Thoracic Diseases, G.B. Morgagni Hospital and University of Bologna, Forlì, Italy. <sup>15</sup>ERN-LUNG member. <sup>16</sup>Medical Library, Amsterdam University Medical Centers, University of Amsterdam, Amsterdam, The Netherlands. <sup>17</sup>Cochrane Netherlands, Julius Center for Health Sciences and Primary Care, University Medical Centre Utrecht, Utrecht University, Utrecht, The Netherlands. <sup>18</sup>Dept of Experimental and Clinical Medicine, Careggi University Hospital and University of Florence, Florence, Italy. <sup>19</sup>Royal Prince Alfred Hospital, Camperdown, Australia. <sup>20</sup>Sydney Medical School, University of Sydney, Sydney, Australia. <sup>21</sup>Dept of Radiology, Pulmonary Radiology, University Hospitals Leuven, Leuven, Belgium. <sup>22</sup>Interstitial Lung Disease Unit, Pulmonary Medicine, Royal Brompton Hospital, London, UK. <sup>23</sup>Margaret Turner Warwick Centre for Fibrosing Lung Disease, National Heart and Lung Institute, Imperial College London, London, UK. <sup>24</sup>Institute of Social and Preventive Medicine, University of Bern, Bern, Switzerland. <sup>25</sup>Shared senior authorship.

Corresponding author: Venerino Poletti ([venerino.poletti@gmail.com](mailto:venerino.poletti@gmail.com))

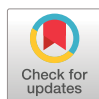

Shareable abstract (@ERSpublications)

**Transbronchial lung cryobiopsy provides important diagnostic information in patients with undiagnosed interstitial lung diseases** <https://bit.ly/3MAR4wc>

**Cite this article as:** Korevaar DA, Colella S, Fally M, et al. European Respiratory Society guidelines on transbronchial lung cryobiopsy in the diagnosis of interstitial lung diseases. *Eur Respir J* 2022; 60: 2200425 [DOI: 10.1183/13993003.00425-2022].

This single-page version can be shared freely online.

## Abstract

**Background** In patients with interstitial lung diseases (ILD), histopathological input is often required to obtain a diagnosis. Surgical lung biopsy (SLB) is considered the reference standard, but many patients are clinically unfit to undergo this invasive procedure, and adverse events, length of hospitalisation and costs are considerable. This European Respiratory Society (ERS) guideline provides evidence-based clinical practice recommendations for the role of transbronchial lung cryobiopsy (TBLC) in obtaining tissue-based diagnosis in patients with undiagnosed ILD.

**Methods** The ERS Task Force consisted of clinical experts in the field of ILD and/or TBLC and methodological experts. Four PICO (Patient, Intervention, Comparator, Outcomes) questions and two narrative questions were formulated. Systematic literature searches were performed in MEDLINE and Embase (up to June 2021). GRADE (Grading, Recommendation, Assessment, Development and Evaluation) methodology was applied.

**Results** In patients with undiagnosed ILD and an indication to obtain histopathological data: 1) TBLC is suggested as a replacement test in patients considered eligible to undergo SLB, 2) TBLC is suggested in patients not considered eligible to undergo SLB, 3) SLB is suggested as an add-on test in patients with a non-informative TBLC, 4) no recommendation is made for or against a second TBLC in patients with a

Copyright ©The authors 2022.  
For reproduction rights and  
permissions contact  
[permissions@ersnet.org](mailto:permissions@ersnet.org)

This article has an editorial  
commentary:  
<https://doi.org/10.1183/13993003.01648-2022>

Received: 25 Feb 2022  
Accepted: 7 May 2022

non-informative TBLC and 5) TBLC operators should undergo training, but no recommendation is made for the type of training required.

**Conclusions** TBLC provides important diagnostic information in patients with undiagnosed ILD. Diagnostic yield is lower compared to SLB, at reduced serious adverse events and length of hospitalisation. Certainty of the evidence is mostly “very low”.
